# Supplementary material
Source: PubMed Central journal article supplement (PMC9064928)
Supplement: NIHMS1786579-supplement-1.pdf [file NIHMS1786579-supplement-1.pdf]

1 Supplemental Materials  
2

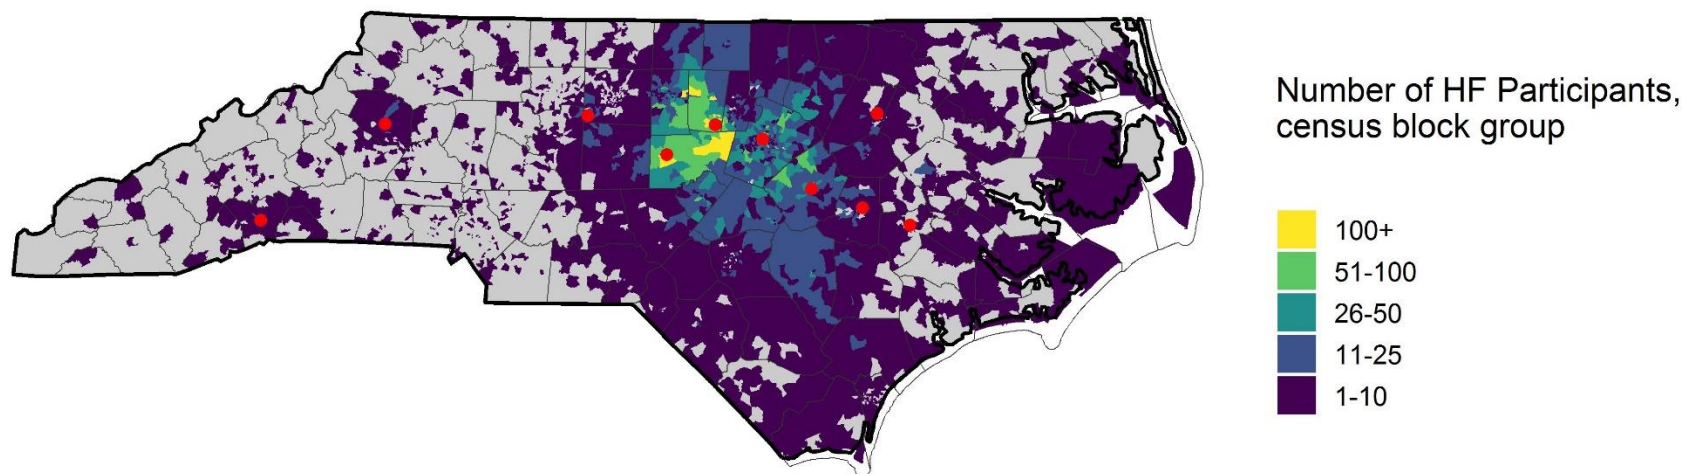

3  
4 Supplemental Figure 1. Map of the density of HF patients by US census block group. Block groups colored grey contain no patients.  
5 UNC-affiliated hospitals are indicated with red circles.

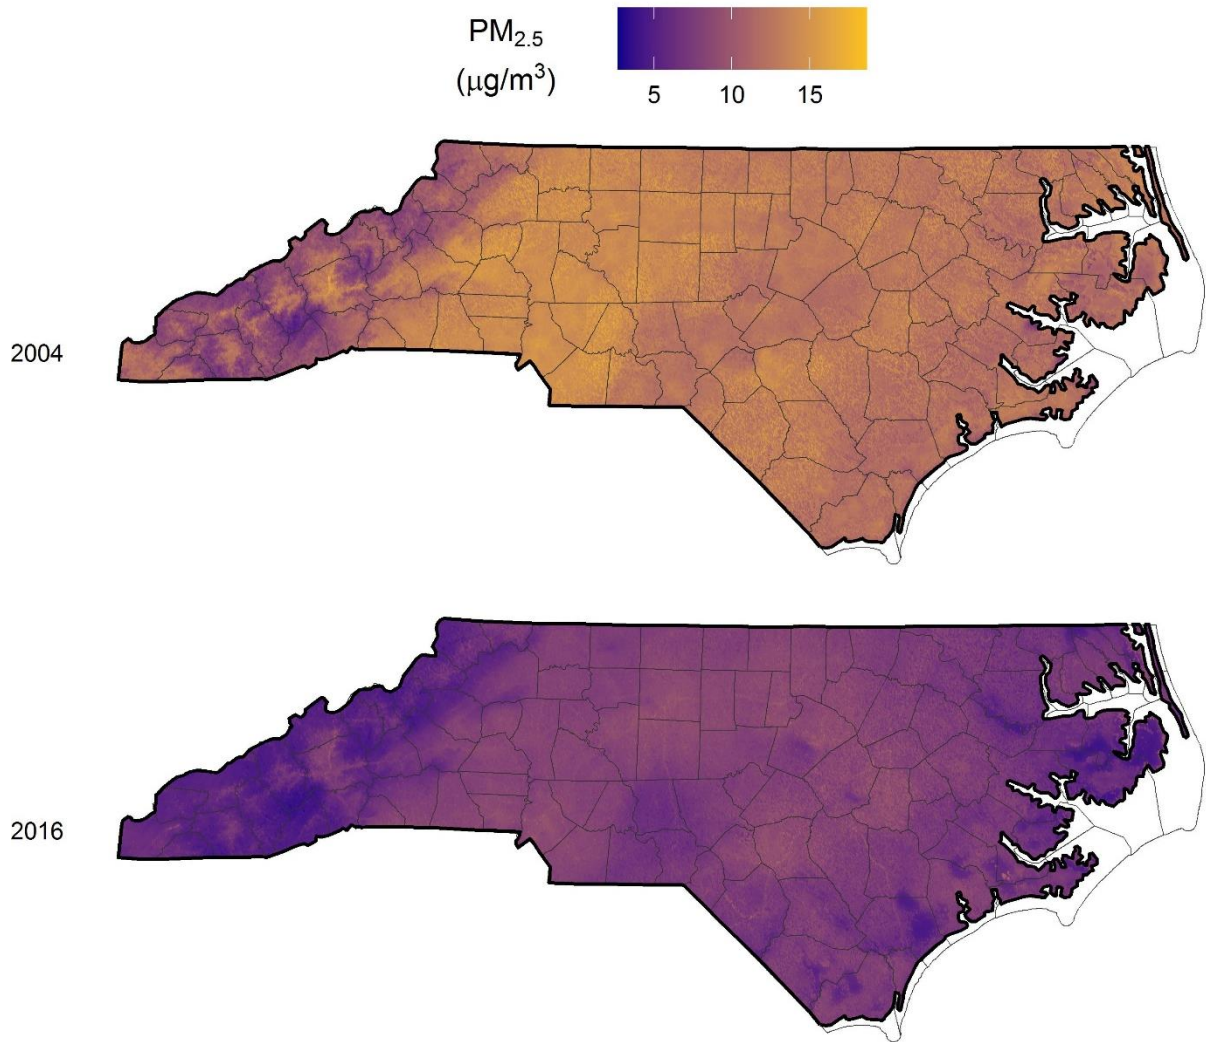

7  
8 Supplemental Figure 2. Annual average PM<sub>2.5</sub> estimated at 1km centroids for 2004 (top) and  
9 2016 (bottom).

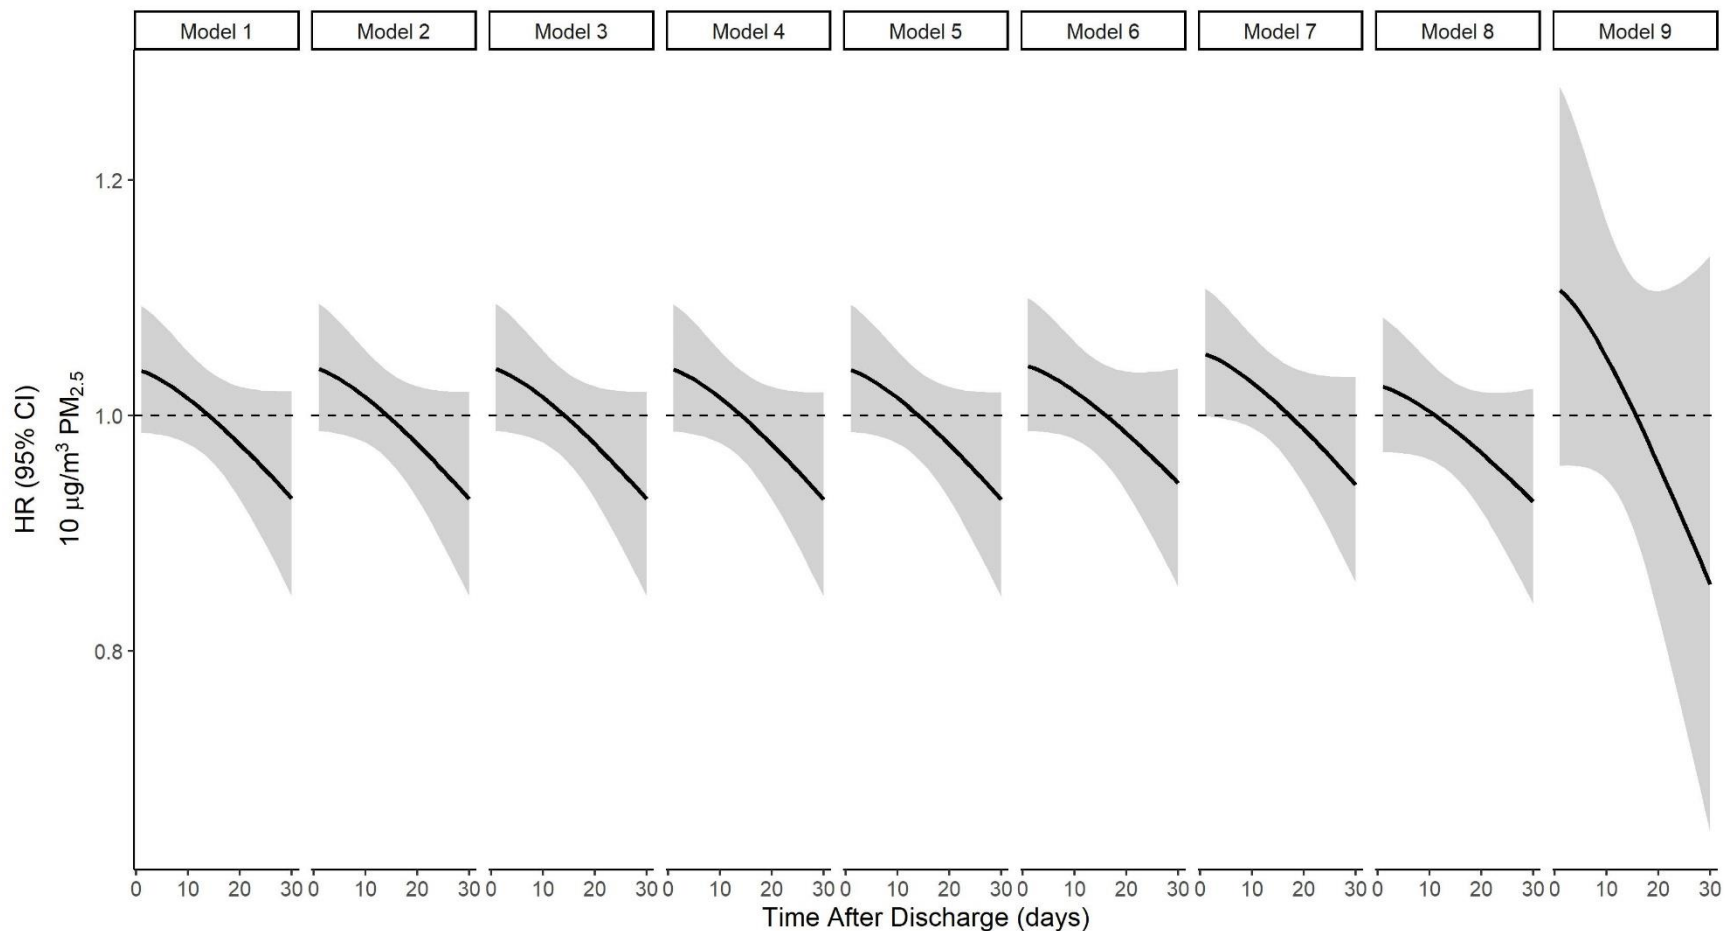

11

12 Supplemental Figure 3. The hazard ratio (HR, 95% CI) of a 30-day readmission for any cause with respect to time after discharge.  
 13 Model 1 represents the adjusted model presented as the primary result, Model 2 represents Model 1 further adjusted for additional  
 14 census tract socioeconomic variables, Model 3 represents Model 1 further adjusted for county ozone, Model 4 represents Model 1  
 15 further adjusted for county level of healthy foods, Model 5 represents Model 1 further adjusted for county level of primary care, Model 6  
 16 represents Model 1 further restricted to individuals with street-level geocoded addresses, Model 7 represents Model 1 with imputed  
 17 smoking status, Model 8 represents Model 1 further restricted to individuals with < 10 readmissions, Model 9 represents Model 1  
 18 further restricted to individuals with ≥ 10 readmissions.

19

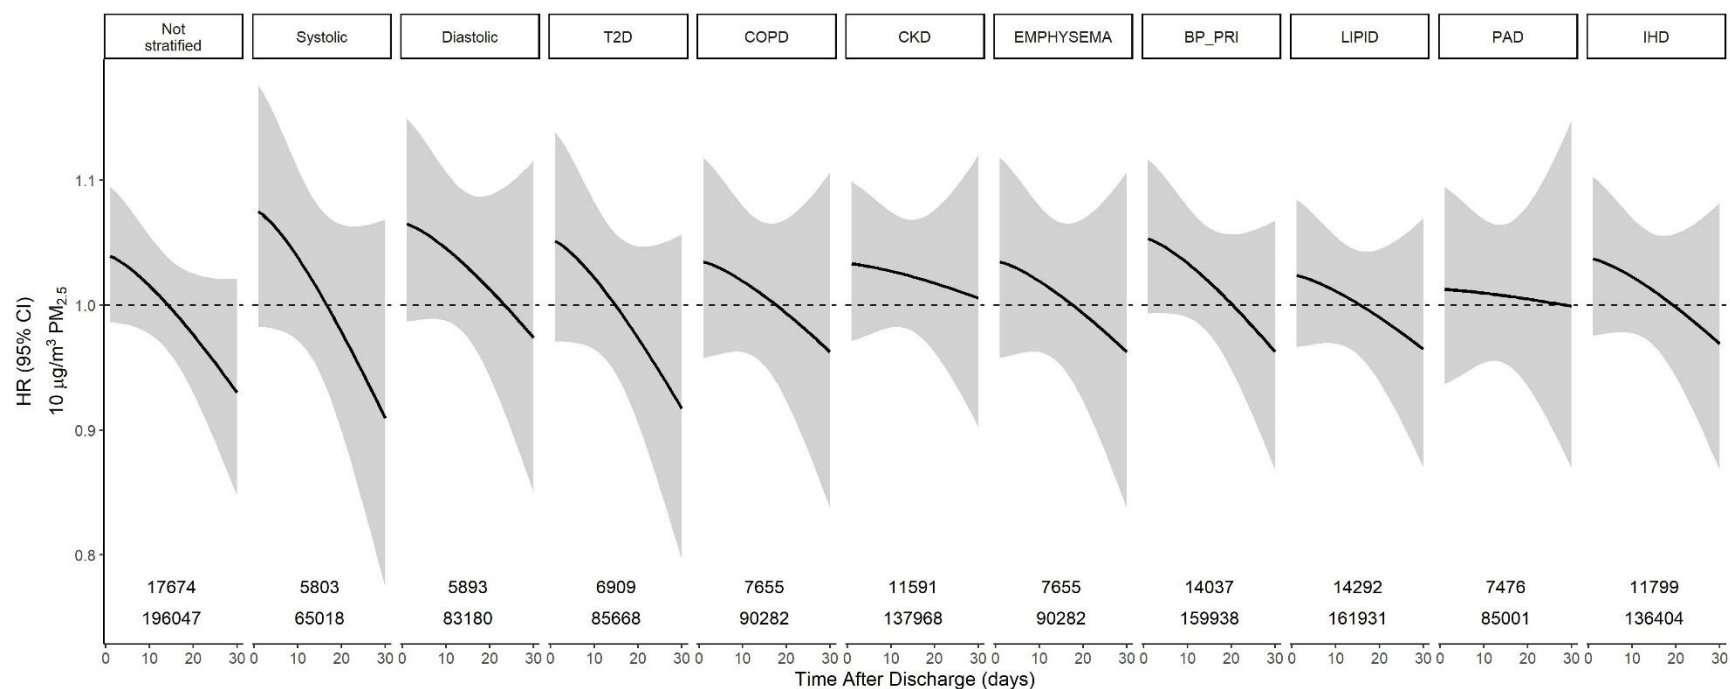

20  
 21 Supplemental Figure 4. The hazard ratio (HR, 95% CI) of a 30-day readmission for any cause with respect to time after discharge for  
 22 the main unstratified model and stratified by HF subtype (systolic and diastolic) and comorbidities. Comorbidities included type 2  
 23 diabetes (T2D), chronic obstructive pulmonary disease (COPD), chronic kidney disease (CKD), emphysema, hypertension (BP\_PRI),  
 24 hyperlipidemia (LIPID), peripheral artery disease (PAD), and ischemic heart disease (IHD). HR is expressed per  $10 \mu\text{g}/\text{m}^3$  increase  
 25 in  $\text{PM}_{2.5}$ . Numbers on the bottom of each grouping represent the number of patients (top) and index hospitalizations (bottom).

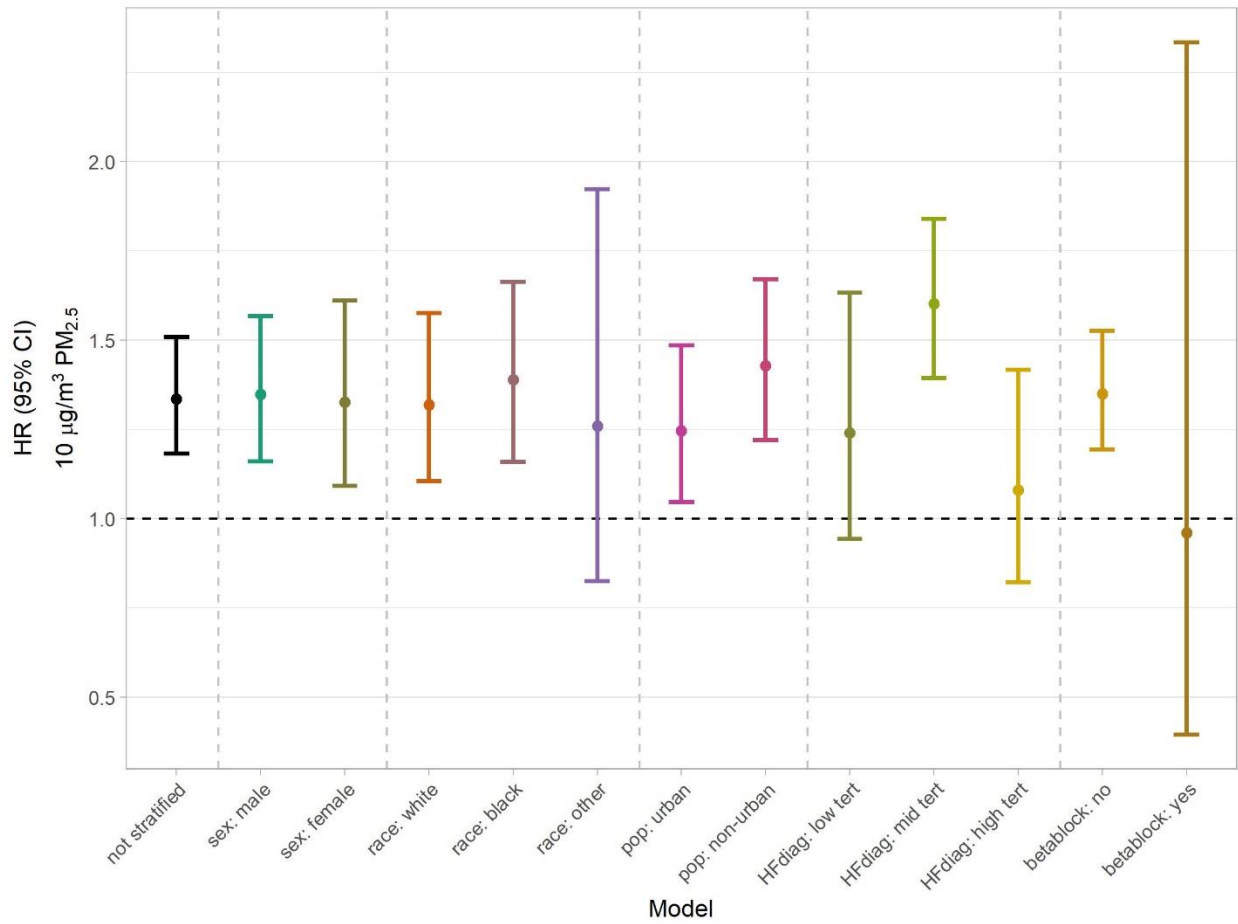

27  
 28 Supplemental Figure 5. The hazard ratio (HR, 95% CI) of an early-readmission for any cause for  
 29 the main unstratified model and stratified by sex, race, urbanicity, time since HF diagnosis, and  
 30 beta blocker prescription. Early readmission was defined as occurring within three days of  
 31 discharge. HR is expressed per 10  $\mu\text{g}/\text{m}^3$  increase in  $\text{PM}_{2.5}$ .  
 32

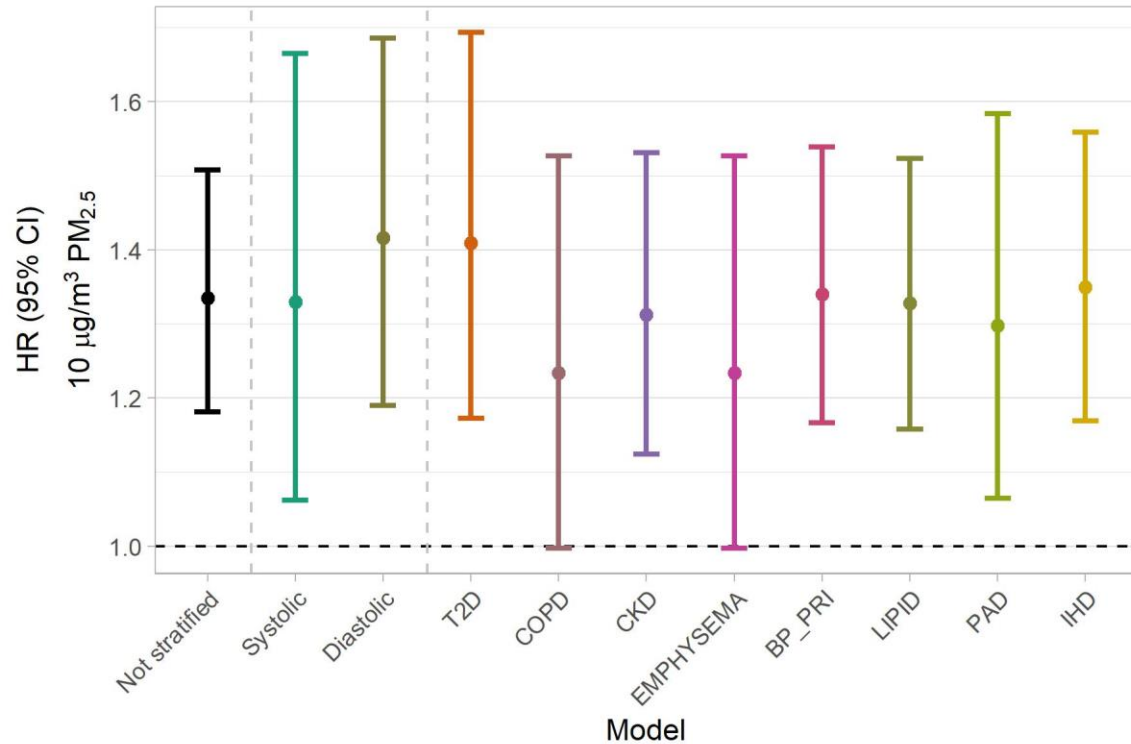

33  
 34 Supplemental Figure 6. The hazard ratio (HR, 95% CI) of an early-readmission for any cause for  
 35 the main unstratified model and stratified by HF subtype (systolic and diastolic) and  
 36 comorbidities. Comorbidities included type 2 diabetes (T2D), chronic obstructive pulmonary  
 37 disease (COPD), chronic kidney disease (CKD), emphysema, hypertension (BP\_PRI),  
 38 hyperlipedemia (LIPID), peripheral artery disease (PAD), and ischemic heart disease (IHD).  
 39 Early readmission was defined as occurring within three days of discharge. HR is expressed per  
 40 10  $\mu\text{g}/\text{m}^3$  increase in  $\text{PM}_{2.5}$ .  
 41

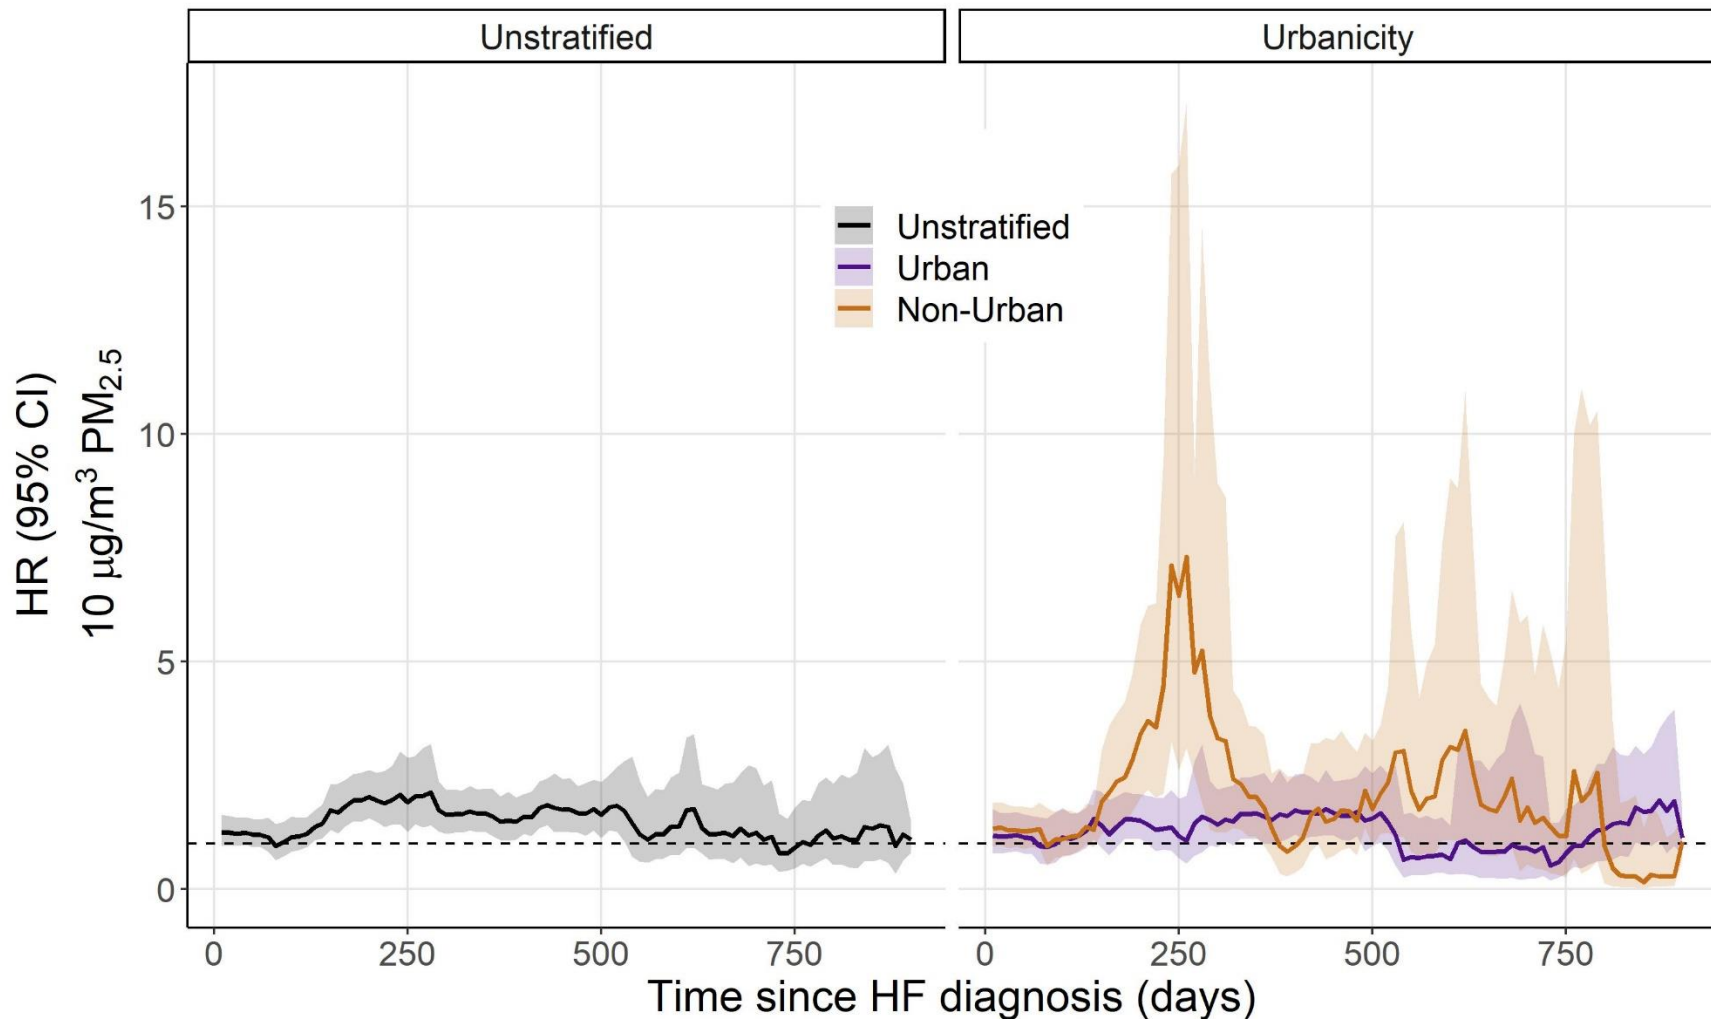

42

43 Supplemental Figure 7. The hazard ratio (HR, 95%CI) for an early-readmission for any cause with respect to time since HF diagnosis  
 44 for the main unstratified model and stratified by urbanicity. HRs were evaluated at different times since HF diagnosis by using 120-  
 45 day rolling windows that were incremented in 10-day intervals. Early readmission was defined as occurring within three days of  
 46 discharge. The median percent urbanicity (86% urban) was used as a cut off to examine readmission hazards in non-urban (below)  
 47 and urban (above) strata. HR is expressed per 10 μg/m<sup>3</sup> increase in PM<sub>2.5</sub>.

48 Supplemental Table 1. List of medications included in beta blocker definition.

| Beta blocker medication list       | Frequency |
|------------------------------------|-----------|
| Acebutolol (Sectral)               | 1         |
| Atenolol (Tenormin)                | 751       |
| Bisoprolol (Zebeta)                | 29        |
| Metoprolol (Lopressor, Toprol XL)  | 4958      |
| Nadolol (Corgard)                  | 18        |
| Nebivolol (Bystolic)               | 36        |
| Propranolol (Inderal, InnoPran XL) | 133       |

49  
50 Supplemental Table 2. The hazard ratio (HR, 95%CI) for a 30-day readmission for any cause  
51 with respect to time after discharge for the main unstratified model and stratified by sex, race,  
52 urbanicity, time since HF diagnosis, and beta blocker prescription. The median percent  
53 urbanicity (86% urban) was used as a cut off to examine readmission hazards in non-urban  
54 (below) and urban (above) strata. HR is expressed per 10  $\mu\text{g}/\text{m}^3$  increase in  $\text{PM}_{2.5}$ .

| Model          | Time | Mean HR (95% CI)     |
|----------------|------|----------------------|
| Not stratified | 1    | 1.039 (0.987, 1.095) |
| Not stratified | 2    | 1.038 (0.986, 1.092) |
| Not stratified | 3    | 1.036 (0.986, 1.088) |
| Not stratified | 4    | 1.033 (0.985, 1.084) |
| Not stratified | 5    | 1.031 (0.984, 1.079) |
| Not stratified | 6    | 1.028 (0.983, 1.075) |
| Not stratified | 7    | 1.025 (0.982, 1.070) |
| Not stratified | 8    | 1.022 (0.981, 1.065) |
| Not stratified | 9    | 1.019 (0.979, 1.060) |
| Not stratified | 10   | 1.015 (0.977, 1.055) |
| Not stratified | 11   | 1.012 (0.975, 1.051) |
| Not stratified | 12   | 1.008 (0.972, 1.047) |
| Not stratified | 13   | 1.005 (0.968, 1.043) |
| Not stratified | 14   | 1.001 (0.964, 1.039) |
| Not stratified | 15   | 0.997 (0.960, 1.036) |
| Not stratified | 16   | 0.993 (0.955, 1.033) |
| Not stratified | 17   | 0.989 (0.949, 1.030) |
| Not stratified | 18   | 0.985 (0.943, 1.028) |
| Not stratified | 19   | 0.981 (0.937, 1.027) |
| Not stratified | 20   | 0.976 (0.930, 1.025) |
| Not stratified | 21   | 0.972 (0.922, 1.024) |
| Not stratified | 22   | 0.967 (0.915, 1.023) |
| Not stratified | 23   | 0.963 (0.907, 1.023) |
| Not stratified | 24   | 0.958 (0.899, 1.022) |
| Not stratified | 25   | 0.954 (0.891, 1.022) |
| Not stratified | 26   | 0.949 (0.882, 1.021) |
| Not stratified | 27   | 0.944 (0.874, 1.021) |
| Not stratified | 28   | 0.940 (0.865, 1.021) |



|                |    |                      |
|----------------|----|----------------------|
| Not stratified | 29 | 0.935 (0.856, 1.021) |
| Not stratified | 30 | 0.930 (0.847, 1.021) |
| Sex: Female    | 1  | 0.987 (0.914, 1.066) |
| Sex: Female    | 2  | 0.987 (0.915, 1.063) |
| Sex: Female    | 3  | 0.986 (0.917, 1.061) |
| Sex: Female    | 4  | 0.986 (0.919, 1.057) |
| Sex: Female    | 5  | 0.985 (0.920, 1.054) |
| Sex: Female    | 6  | 0.984 (0.922, 1.050) |
| Sex: Female    | 7  | 0.983 (0.923, 1.047) |
| Sex: Female    | 8  | 0.982 (0.925, 1.044) |
| Sex: Female    | 9  | 0.982 (0.926, 1.040) |
| Sex: Female    | 10 | 0.981 (0.927, 1.037) |
| Sex: Female    | 11 | 0.980 (0.928, 1.034) |
| Sex: Female    | 12 | 0.979 (0.928, 1.032) |
| Sex: Female    | 13 | 0.978 (0.927, 1.030) |
| Sex: Female    | 14 | 0.977 (0.926, 1.029) |
| Sex: Female    | 15 | 0.975 (0.925, 1.029) |
| Sex: Female    | 16 | 0.974 (0.922, 1.029) |
| Sex: Female    | 17 | 0.973 (0.919, 1.030) |
| Sex: Female    | 18 | 0.972 (0.915, 1.032) |
| Sex: Female    | 19 | 0.971 (0.911, 1.035) |
| Sex: Female    | 20 | 0.970 (0.906, 1.038) |
| Sex: Female    | 21 | 0.968 (0.901, 1.041) |
| Sex: Female    | 22 | 0.967 (0.895, 1.045) |
| Sex: Female    | 23 | 0.966 (0.889, 1.049) |
| Sex: Female    | 24 | 0.964 (0.882, 1.054) |
| Sex: Female    | 25 | 0.963 (0.876, 1.059) |
| Sex: Female    | 26 | 0.962 (0.869, 1.065) |
| Sex: Female    | 27 | 0.960 (0.862, 1.071) |
| Sex: Female    | 28 | 0.959 (0.854, 1.076) |
| Sex: Female    | 29 | 0.958 (0.847, 1.083) |
| Sex: Female    | 30 | 0.956 (0.839, 1.089) |
| Sex: Male      | 1  | 1.092 (1.019, 1.171) |
| Sex: Male      | 2  | 1.089 (1.018, 1.166) |
| Sex: Male      | 3  | 1.085 (1.016, 1.159) |
| Sex: Male      | 4  | 1.081 (1.014, 1.153) |
| Sex: Male      | 5  | 1.077 (1.012, 1.145) |
| Sex: Male      | 6  | 1.072 (1.010, 1.138) |
| Sex: Male      | 7  | 1.067 (1.007, 1.130) |
| Sex: Male      | 8  | 1.061 (1.004, 1.122) |
| Sex: Male      | 9  | 1.056 (1.000, 1.114) |
| Sex: Male      | 10 | 1.050 (0.996, 1.106) |
| Sex: Male      | 11 | 1.044 (0.991, 1.099) |

|             |    |                      |
|-------------|----|----------------------|
| Sex: Male   | 12 | 1.037 (0.986, 1.092) |
| Sex: Male   | 13 | 1.031 (0.979, 1.085) |
| Sex: Male   | 14 | 1.024 (0.972, 1.079) |
| Sex: Male   | 15 | 1.017 (0.964, 1.074) |
| Sex: Male   | 16 | 1.011 (0.955, 1.069) |
| Sex: Male   | 17 | 1.004 (0.946, 1.064) |
| Sex: Male   | 18 | 0.996 (0.936, 1.060) |
| Sex: Male   | 19 | 0.989 (0.926, 1.057) |
| Sex: Male   | 20 | 0.982 (0.915, 1.054) |
| Sex: Male   | 21 | 0.974 (0.903, 1.051) |
| Sex: Male   | 22 | 0.967 (0.891, 1.048) |
| Sex: Male   | 23 | 0.959 (0.879, 1.046) |
| Sex: Male   | 24 | 0.951 (0.867, 1.044) |
| Sex: Male   | 25 | 0.944 (0.855, 1.041) |
| Sex: Male   | 26 | 0.936 (0.842, 1.040) |
| Sex: Male   | 27 | 0.928 (0.830, 1.038) |
| Sex: Male   | 28 | 0.920 (0.817, 1.036) |
| Sex: Male   | 29 | 0.912 (0.804, 1.034) |
| Sex: Male   | 30 | 0.904 (0.791, 1.033) |
| Race: White | 1  | 1.028 (0.958, 1.102) |
| Race: White | 2  | 1.025 (0.958, 1.098) |
| Race: White | 3  | 1.023 (0.957, 1.093) |
| Race: White | 4  | 1.020 (0.956, 1.087) |
| Race: White | 5  | 1.017 (0.955, 1.082) |
| Race: White | 6  | 1.013 (0.954, 1.076) |
| Race: White | 7  | 1.009 (0.953, 1.069) |
| Race: White | 8  | 1.005 (0.951, 1.063) |
| Race: White | 9  | 1.001 (0.949, 1.057) |
| Race: White | 10 | 0.997 (0.946, 1.050) |
| Race: White | 11 | 0.992 (0.943, 1.044) |
| Race: White | 12 | 0.988 (0.939, 1.039) |
| Race: White | 13 | 0.983 (0.935, 1.033) |
| Race: White | 14 | 0.978 (0.930, 1.028) |
| Race: White | 15 | 0.973 (0.924, 1.024) |
| Race: White | 16 | 0.968 (0.918, 1.020) |
| Race: White | 17 | 0.963 (0.911, 1.017) |
| Race: White | 18 | 0.957 (0.903, 1.014) |
| Race: White | 19 | 0.952 (0.895, 1.012) |
| Race: White | 20 | 0.946 (0.887, 1.010) |
| Race: White | 21 | 0.941 (0.878, 1.008) |
| Race: White | 22 | 0.935 (0.869, 1.007) |
| Race: White | 23 | 0.929 (0.859, 1.006) |
| Race: White | 24 | 0.924 (0.849, 1.005) |

|             |    |                      |
|-------------|----|----------------------|
| Race: White | 25 | 0.918 (0.839, 1.004) |
| Race: White | 26 | 0.912 (0.828, 1.004) |
| Race: White | 27 | 0.906 (0.818, 1.003) |
| Race: White | 28 | 0.900 (0.807, 1.003) |
| Race: White | 29 | 0.894 (0.797, 1.003) |
| Race: White | 30 | 0.888 (0.786, 1.003) |
| Race: Black | 1  | 1.055 (0.970, 1.147) |
| Race: Black | 2  | 1.054 (0.972, 1.144) |
| Race: Black | 3  | 1.054 (0.973, 1.141) |
| Race: Black | 4  | 1.053 (0.975, 1.137) |
| Race: Black | 5  | 1.052 (0.977, 1.132) |
| Race: Black | 6  | 1.051 (0.979, 1.128) |
| Race: Black | 7  | 1.050 (0.981, 1.124) |
| Race: Black | 8  | 1.049 (0.983, 1.120) |
| Race: Black | 9  | 1.048 (0.984, 1.116) |
| Race: Black | 10 | 1.047 (0.985, 1.112) |
| Race: Black | 11 | 1.045 (0.986, 1.109) |
| Race: Black | 12 | 1.044 (0.985, 1.106) |
| Race: Black | 13 | 1.043 (0.984, 1.104) |
| Race: Black | 14 | 1.041 (0.983, 1.103) |
| Race: Black | 15 | 1.040 (0.980, 1.103) |
| Race: Black | 16 | 1.039 (0.977, 1.104) |
| Race: Black | 17 | 1.037 (0.973, 1.106) |
| Race: Black | 18 | 1.036 (0.968, 1.108) |
| Race: Black | 19 | 1.034 (0.962, 1.112) |
| Race: Black | 20 | 1.032 (0.956, 1.115) |
| Race: Black | 21 | 1.031 (0.949, 1.120) |
| Race: Black | 22 | 1.029 (0.942, 1.125) |
| Race: Black | 23 | 1.028 (0.934, 1.131) |
| Race: Black | 24 | 1.026 (0.926, 1.137) |
| Race: Black | 25 | 1.024 (0.918, 1.143) |
| Race: Black | 26 | 1.022 (0.909, 1.150) |
| Race: Black | 27 | 1.021 (0.900, 1.157) |
| Race: Black | 28 | 1.019 (0.892, 1.164) |
| Race: Black | 29 | 1.017 (0.883, 1.172) |
| Race: Black | 30 | 1.015 (0.874, 1.180) |
| Race: Other | 1  | 1.054 (0.869, 1.278) |
| Race: Other | 2  | 1.051 (0.871, 1.269) |
| Race: Other | 3  | 1.048 (0.873, 1.257) |
| Race: Other | 4  | 1.044 (0.875, 1.245) |
| Race: Other | 5  | 1.040 (0.877, 1.232) |
| Race: Other | 6  | 1.035 (0.879, 1.219) |
| Race: Other | 7  | 1.030 (0.880, 1.206) |

|             |    |                      |
|-------------|----|----------------------|
| Race: Other | 8  | 1.025 (0.880, 1.194) |
| Race: Other | 9  | 1.019 (0.878, 1.183) |
| Race: Other | 10 | 1.014 (0.876, 1.173) |
| Race: Other | 11 | 1.008 (0.871, 1.165) |
| Race: Other | 12 | 1.002 (0.865, 1.159) |
| Race: Other | 13 | 0.995 (0.857, 1.156) |
| Race: Other | 14 | 0.989 (0.847, 1.154) |
| Race: Other | 15 | 0.982 (0.836, 1.155) |
| Race: Other | 16 | 0.976 (0.822, 1.158) |
| Race: Other | 17 | 0.969 (0.807, 1.163) |
| Race: Other | 18 | 0.962 (0.791, 1.170) |
| Race: Other | 19 | 0.955 (0.775, 1.178) |
| Race: Other | 20 | 0.948 (0.757, 1.187) |
| Race: Other | 21 | 0.941 (0.739, 1.198) |
| Race: Other | 22 | 0.934 (0.720, 1.210) |
| Race: Other | 23 | 0.926 (0.701, 1.224) |
| Race: Other | 24 | 0.919 (0.682, 1.238) |
| Race: Other | 25 | 0.911 (0.663, 1.253) |
| Race: Other | 26 | 0.904 (0.644, 1.269) |
| Race: Other | 27 | 0.896 (0.625, 1.286) |
| Race: Other | 28 | 0.888 (0.606, 1.303) |
| Race: Other | 29 | 0.881 (0.587, 1.322) |
| Race: Other | 30 | 0.873 (0.568, 1.341) |
| Pop: Urban  | 1  | 0.958 (0.889, 1.032) |
| Pop: Urban  | 2  | 0.959 (0.892, 1.031) |
| Pop: Urban  | 3  | 0.960 (0.895, 1.031) |
| Pop: Urban  | 4  | 0.962 (0.898, 1.030) |
| Pop: Urban  | 5  | 0.963 (0.902, 1.029) |
| Pop: Urban  | 6  | 0.965 (0.905, 1.028) |
| Pop: Urban  | 7  | 0.967 (0.909, 1.028) |
| Pop: Urban  | 8  | 0.969 (0.913, 1.028) |
| Pop: Urban  | 9  | 0.970 (0.917, 1.028) |
| Pop: Urban  | 10 | 0.973 (0.920, 1.028) |
| Pop: Urban  | 11 | 0.975 (0.924, 1.029) |
| Pop: Urban  | 12 | 0.977 (0.927, 1.030) |
| Pop: Urban  | 13 | 0.979 (0.930, 1.032) |
| Pop: Urban  | 14 | 0.982 (0.932, 1.034) |
| Pop: Urban  | 15 | 0.984 (0.934, 1.038) |
| Pop: Urban  | 16 | 0.987 (0.935, 1.042) |
| Pop: Urban  | 17 | 0.989 (0.935, 1.047) |
| Pop: Urban  | 18 | 0.992 (0.936, 1.052) |
| Pop: Urban  | 19 | 0.995 (0.935, 1.059) |
| Pop: Urban  | 20 | 0.998 (0.934, 1.066) |

|                 |    |                      |
|-----------------|----|----------------------|
| Pop: Urban      | 21 | 1.001 (0.933, 1.073) |
| Pop: Urban      | 22 | 1.004 (0.931, 1.082) |
| Pop: Urban      | 23 | 1.007 (0.929, 1.091) |
| Pop: Urban      | 24 | 1.010 (0.927, 1.100) |
| Pop: Urban      | 25 | 1.013 (0.924, 1.110) |
| Pop: Urban      | 26 | 1.016 (0.922, 1.120) |
| Pop: Urban      | 27 | 1.019 (0.919, 1.131) |
| Pop: Urban      | 28 | 1.023 (0.916, 1.142) |
| Pop: Urban      | 29 | 1.026 (0.913, 1.154) |
| Pop: Urban      | 30 | 1.030 (0.909, 1.166) |
| Pop: Non-Urban  | 1  | 1.127 (1.049, 1.210) |
| Pop: Non-Urban  | 2  | 1.122 (1.046, 1.203) |
| Pop: Non-Urban  | 3  | 1.116 (1.043, 1.194) |
| Pop: Non-Urban  | 4  | 1.109 (1.039, 1.184) |
| Pop: Non-Urban  | 5  | 1.102 (1.034, 1.174) |
| Pop: Non-Urban  | 6  | 1.094 (1.029, 1.163) |
| Pop: Non-Urban  | 7  | 1.085 (1.023, 1.151) |
| Pop: Non-Urban  | 8  | 1.076 (1.017, 1.139) |
| Pop: Non-Urban  | 9  | 1.067 (1.010, 1.127) |
| Pop: Non-Urban  | 10 | 1.057 (1.002, 1.115) |
| Pop: Non-Urban  | 11 | 1.047 (0.993, 1.104) |
| Pop: Non-Urban  | 12 | 1.037 (0.984, 1.092) |
| Pop: Non-Urban  | 13 | 1.026 (0.974, 1.082) |
| Pop: Non-Urban  | 14 | 1.016 (0.963, 1.071) |
| Pop: Non-Urban  | 15 | 1.005 (0.951, 1.061) |
| Pop: Non-Urban  | 16 | 0.994 (0.938, 1.052) |
| Pop: Non-Urban  | 17 | 0.982 (0.925, 1.043) |
| Pop: Non-Urban  | 18 | 0.971 (0.911, 1.035) |
| Pop: Non-Urban  | 19 | 0.960 (0.896, 1.027) |
| Pop: Non-Urban  | 20 | 0.948 (0.881, 1.020) |
| Pop: Non-Urban  | 21 | 0.936 (0.866, 1.012) |
| Pop: Non-Urban  | 22 | 0.925 (0.850, 1.005) |
| Pop: Non-Urban  | 23 | 0.913 (0.835, 0.998) |
| Pop: Non-Urban  | 24 | 0.901 (0.819, 0.991) |
| Pop: Non-Urban  | 25 | 0.889 (0.803, 0.985) |
| Pop: Non-Urban  | 26 | 0.877 (0.786, 0.978) |
| Pop: Non-Urban  | 27 | 0.865 (0.770, 0.972) |
| Pop: Non-Urban  | 28 | 0.853 (0.754, 0.965) |
| Pop: Non-Urban  | 29 | 0.841 (0.738, 0.959) |
| Pop: Non-Urban  | 30 | 0.829 (0.722, 0.952) |
| BetaBlocker: No | 1  | 1.075 (1.013, 1.141) |
| BetaBlocker: No | 2  | 1.072 (1.012, 1.136) |
| BetaBlocker: No | 3  | 1.069 (1.010, 1.131) |

|                  |    |                      |
|------------------|----|----------------------|
| BetaBlocker: No  | 4  | 1.065 (1.009, 1.125) |
| BetaBlocker: No  | 5  | 1.061 (1.007, 1.118) |
| BetaBlocker: No  | 6  | 1.056 (1.004, 1.112) |
| BetaBlocker: No  | 7  | 1.052 (1.001, 1.104) |
| BetaBlocker: No  | 8  | 1.046 (0.998, 1.097) |
| BetaBlocker: No  | 9  | 1.041 (0.995, 1.090) |
| BetaBlocker: No  | 10 | 1.036 (0.990, 1.083) |
| BetaBlocker: No  | 11 | 1.030 (0.986, 1.076) |
| BetaBlocker: No  | 12 | 1.024 (0.981, 1.069) |
| BetaBlocker: No  | 13 | 1.018 (0.975, 1.063) |
| BetaBlocker: No  | 14 | 1.012 (0.968, 1.057) |
| BetaBlocker: No  | 15 | 1.005 (0.961, 1.051) |
| BetaBlocker: No  | 16 | 0.999 (0.953, 1.046) |
| BetaBlocker: No  | 17 | 0.992 (0.944, 1.042) |
| BetaBlocker: No  | 18 | 0.985 (0.935, 1.038) |
| BetaBlocker: No  | 19 | 0.978 (0.926, 1.034) |
| BetaBlocker: No  | 20 | 0.971 (0.916, 1.030) |
| BetaBlocker: No  | 21 | 0.964 (0.906, 1.027) |
| BetaBlocker: No  | 22 | 0.957 (0.895, 1.024) |
| BetaBlocker: No  | 23 | 0.950 (0.884, 1.021) |
| BetaBlocker: No  | 24 | 0.943 (0.873, 1.018) |
| BetaBlocker: No  | 25 | 0.935 (0.861, 1.015) |
| BetaBlocker: No  | 26 | 0.928 (0.850, 1.013) |
| BetaBlocker: No  | 27 | 0.920 (0.838, 1.010) |
| BetaBlocker: No  | 28 | 0.913 (0.827, 1.008) |
| BetaBlocker: No  | 29 | 0.905 (0.815, 1.006) |
| BetaBlocker: No  | 30 | 0.898 (0.803, 1.003) |
| BetaBlocker: Yes | 1  | 0.999 (0.903, 1.105) |
| BetaBlocker: Yes | 2  | 1.000 (0.906, 1.103) |
| BetaBlocker: Yes | 3  | 1.001 (0.910, 1.101) |
| BetaBlocker: Yes | 4  | 1.002 (0.914, 1.099) |
| BetaBlocker: Yes | 5  | 1.004 (0.918, 1.097) |
| BetaBlocker: Yes | 6  | 1.005 (0.923, 1.095) |
| BetaBlocker: Yes | 7  | 1.007 (0.928, 1.093) |
| BetaBlocker: Yes | 8  | 1.009 (0.933, 1.091) |
| BetaBlocker: Yes | 9  | 1.011 (0.938, 1.090) |
| BetaBlocker: Yes | 10 | 1.013 (0.943, 1.089) |
| BetaBlocker: Yes | 11 | 1.015 (0.947, 1.088) |
| BetaBlocker: Yes | 12 | 1.018 (0.952, 1.088) |
| BetaBlocker: Yes | 13 | 1.020 (0.955, 1.089) |
| BetaBlocker: Yes | 14 | 1.022 (0.958, 1.091) |
| BetaBlocker: Yes | 15 | 1.025 (0.960, 1.095) |
| BetaBlocker: Yes | 16 | 1.028 (0.961, 1.099) |

|                                       |    |                      |
|---------------------------------------|----|----------------------|
| BetaBlocker: Yes                      | 17 | 1.030 (0.961, 1.104) |
| BetaBlocker: Yes                      | 18 | 1.033 (0.960, 1.111) |
| BetaBlocker: Yes                      | 19 | 1.036 (0.959, 1.119) |
| BetaBlocker: Yes                      | 20 | 1.039 (0.957, 1.127) |
| BetaBlocker: Yes                      | 21 | 1.041 (0.954, 1.137) |
| BetaBlocker: Yes                      | 22 | 1.044 (0.950, 1.148) |
| BetaBlocker: Yes                      | 23 | 1.048 (0.947, 1.159) |
| BetaBlocker: Yes                      | 24 | 1.051 (0.942, 1.171) |
| BetaBlocker: Yes                      | 25 | 1.054 (0.938, 1.184) |
| BetaBlocker: Yes                      | 26 | 1.057 (0.933, 1.198) |
| BetaBlocker: Yes                      | 27 | 1.060 (0.928, 1.212) |
| BetaBlocker: Yes                      | 28 | 1.064 (0.922, 1.227) |
| BetaBlocker: Yes                      | 29 | 1.067 (0.916, 1.242) |
| BetaBlocker: Yes                      | 30 | 1.071 (0.911, 1.258) |
| Time since HF diagnosis: lower (<68d) | 1  | 0.960 (0.869, 1.059) |
| Time since HF diagnosis: lower (<68d) | 2  | 0.960 (0.872, 1.057) |
| Time since HF diagnosis: lower (<68d) | 3  | 0.960 (0.875, 1.055) |
| Time since HF diagnosis: lower (<68d) | 4  | 0.961 (0.878, 1.052) |
| Time since HF diagnosis: lower (<68d) | 5  | 0.962 (0.881, 1.050) |
| Time since HF diagnosis: lower (<68d) | 6  | 0.962 (0.885, 1.047) |
| Time since HF diagnosis: lower (<68d) | 7  | 0.963 (0.888, 1.044) |
| Time since HF diagnosis: lower (<68d) | 8  | 0.964 (0.892, 1.042) |
| Time since HF diagnosis: lower (<68d) | 9  | 0.965 (0.895, 1.040) |
| Time since HF diagnosis: lower (<68d) | 10 | 0.966 (0.898, 1.039) |
| Time since HF diagnosis: lower (<68d) | 11 | 0.966 (0.900, 1.038) |
| Time since HF diagnosis: lower (<68d) | 12 | 0.967 (0.902, 1.037) |
| Time since HF diagnosis: lower (<68d) | 13 | 0.968 (0.903, 1.038) |
| Time since HF diagnosis: lower (<68d) | 14 | 0.969 (0.904, 1.040) |
| Time since HF diagnosis: lower (<68d) | 15 | 0.970 (0.903, 1.043) |
| Time since HF diagnosis: lower (<68d) | 16 | 0.971 (0.902, 1.046) |
| Time since HF diagnosis: lower (<68d) | 17 | 0.972 (0.900, 1.051) |
| Time since HF diagnosis: lower (<68d) | 18 | 0.974 (0.897, 1.057) |
| Time since HF diagnosis: lower (<68d) | 19 | 0.975 (0.893, 1.064) |
| Time since HF diagnosis: lower (<68d) | 20 | 0.976 (0.889, 1.071) |
| Time since HF diagnosis: lower (<68d) | 21 | 0.977 (0.884, 1.079) |
| Time since HF diagnosis: lower (<68d) | 22 | 0.978 (0.879, 1.088) |
| Time since HF diagnosis: lower (<68d) | 23 | 0.980 (0.874, 1.098) |
| Time since HF diagnosis: lower (<68d) | 24 | 0.981 (0.868, 1.109) |
| Time since HF diagnosis: lower (<68d) | 25 | 0.982 (0.862, 1.119) |
| Time since HF diagnosis: lower (<68d) | 26 | 0.983 (0.855, 1.131) |
| Time since HF diagnosis: lower (<68d) | 27 | 0.985 (0.848, 1.143) |
| Time since HF diagnosis: lower (<68d) | 28 | 0.986 (0.841, 1.155) |
| Time since HF diagnosis: lower (<68d) | 29 | 0.987 (0.834, 1.168) |

|                                            |    |                      |
|--------------------------------------------|----|----------------------|
| Time since HF diagnosis: lower (<68d)      | 30 | 0.989 (0.827, 1.182) |
| Time since HF diagnosis: middle (<68-683d) | 1  | 1.120 (1.035, 1.213) |
| Time since HF diagnosis: middle (<68-683d) | 2  | 1.116 (1.033, 1.206) |
| Time since HF diagnosis: middle (<68-683d) | 3  | 1.111 (1.031, 1.198) |
| Time since HF diagnosis: middle (<68-683d) | 4  | 1.105 (1.028, 1.188) |
| Time since HF diagnosis: middle (<68-683d) | 5  | 1.099 (1.024, 1.179) |
| Time since HF diagnosis: middle (<68-683d) | 6  | 1.092 (1.020, 1.168) |
| Time since HF diagnosis: middle (<68-683d) | 7  | 1.084 (1.016, 1.157) |
| Time since HF diagnosis: middle (<68-683d) | 8  | 1.076 (1.010, 1.147) |
| Time since HF diagnosis: middle (<68-683d) | 9  | 1.068 (1.005, 1.136) |
| Time since HF diagnosis: middle (<68-683d) | 10 | 1.060 (0.998, 1.125) |
| Time since HF diagnosis: middle (<68-683d) | 11 | 1.051 (0.991, 1.115) |
| Time since HF diagnosis: middle (<68-683d) | 12 | 1.042 (0.983, 1.104) |
| Time since HF diagnosis: middle (<68-683d) | 13 | 1.033 (0.974, 1.095) |
| Time since HF diagnosis: middle (<68-683d) | 14 | 1.023 (0.965, 1.086) |
| Time since HF diagnosis: middle (<68-683d) | 15 | 1.014 (0.954, 1.078) |
| Time since HF diagnosis: middle (<68-683d) | 16 | 1.004 (0.942, 1.070) |
| Time since HF diagnosis: middle (<68-683d) | 17 | 0.994 (0.930, 1.063) |
| Time since HF diagnosis: middle (<68-683d) | 18 | 0.984 (0.917, 1.056) |
| Time since HF diagnosis: middle (<68-683d) | 19 | 0.974 (0.904, 1.050) |
| Time since HF diagnosis: middle (<68-683d) | 20 | 0.964 (0.890, 1.044) |
| Time since HF diagnosis: middle (<68-683d) | 21 | 0.953 (0.875, 1.038) |
| Time since HF diagnosis: middle (<68-683d) | 22 | 0.943 (0.861, 1.033) |
| Time since HF diagnosis: middle (<68-683d) | 23 | 0.932 (0.845, 1.028) |
| Time since HF diagnosis: middle (<68-683d) | 24 | 0.922 (0.830, 1.023) |
| Time since HF diagnosis: middle (<68-683d) | 25 | 0.911 (0.815, 1.019) |
| Time since HF diagnosis: middle (<68-683d) | 26 | 0.900 (0.800, 1.014) |
| Time since HF diagnosis: middle (<68-683d) | 27 | 0.890 (0.784, 1.010) |
| Time since HF diagnosis: middle (<68-683d) | 28 | 0.879 (0.768, 1.005) |
| Time since HF diagnosis: middle (<68-683d) | 29 | 0.868 (0.753, 1.001) |
| Time since HF diagnosis: middle (<68-683d) | 30 | 0.857 (0.738, 0.997) |
| Time since HF diagnosis: upper (>683d)     | 1  | 1.013 (0.921, 1.115) |
| Time since HF diagnosis: upper (>683d)     | 2  | 1.013 (0.922, 1.112) |
| Time since HF diagnosis: upper (>683d)     | 3  | 1.012 (0.924, 1.108) |
| Time since HF diagnosis: upper (>683d)     | 4  | 1.011 (0.926, 1.104) |
| Time since HF diagnosis: upper (>683d)     | 5  | 1.011 (0.929, 1.100) |
| Time since HF diagnosis: upper (>683d)     | 6  | 1.010 (0.931, 1.096) |
| Time since HF diagnosis: upper (>683d)     | 7  | 1.009 (0.933, 1.091) |
| Time since HF diagnosis: upper (>683d)     | 8  | 1.008 (0.935, 1.087) |
| Time since HF diagnosis: upper (>683d)     | 9  | 1.008 (0.937, 1.083) |
| Time since HF diagnosis: upper (>683d)     | 10 | 1.007 (0.939, 1.079) |
| Time since HF diagnosis: upper (>683d)     | 11 | 1.006 (0.940, 1.075) |
| Time since HF diagnosis: upper (>683d)     | 12 | 1.005 (0.941, 1.072) |



|                                        |    |                      |
|----------------------------------------|----|----------------------|
| Time since HF diagnosis: upper (>683d) | 13 | 1.004 (0.941, 1.070) |
| Time since HF diagnosis: upper (>683d) | 14 | 1.003 (0.940, 1.069) |
| Time since HF diagnosis: upper (>683d) | 15 | 1.001 (0.939, 1.068) |
| Time since HF diagnosis: upper (>683d) | 16 | 1.000 (0.937, 1.068) |
| Time since HF diagnosis: upper (>683d) | 17 | 0.999 (0.934, 1.069) |
| Time since HF diagnosis: upper (>683d) | 18 | 0.998 (0.929, 1.072) |
| Time since HF diagnosis: upper (>683d) | 19 | 0.997 (0.925, 1.074) |
| Time since HF diagnosis: upper (>683d) | 20 | 0.996 (0.919, 1.078) |
| Time since HF diagnosis: upper (>683d) | 21 | 0.994 (0.913, 1.083) |
| Time since HF diagnosis: upper (>683d) | 22 | 0.993 (0.907, 1.088) |
| Time since HF diagnosis: upper (>683d) | 23 | 0.992 (0.900, 1.093) |
| Time since HF diagnosis: upper (>683d) | 24 | 0.990 (0.892, 1.100) |
| Time since HF diagnosis: upper (>683d) | 25 | 0.989 (0.884, 1.106) |
| Time since HF diagnosis: upper (>683d) | 26 | 0.988 (0.876, 1.113) |
| Time since HF diagnosis: upper (>683d) | 27 | 0.986 (0.868, 1.121) |
| Time since HF diagnosis: upper (>683d) | 28 | 0.985 (0.860, 1.129) |
| Time since HF diagnosis: upper (>683d) | 29 | 0.984 (0.851, 1.137) |
| Time since HF diagnosis: upper (>683d) | 30 | 0.982 (0.842, 1.146) |

55  
56 Supplemental Table 3. The hazard ratio (HR, 95% CI) of an early-readmission (3-day  
57 readmission) for any cause for the main unstratified model and stratified by sex, race, urbanicity,  
58 time since HF diagnosis, and beta blocker prescription. Early readmission was defined as  
59 occurring within three days of discharge. The median percent urbanicity (86% urban) was used  
60 as a cut off to examine readmission hazards in non-urban (below) and urban (above) strata. HR  
61 is expressed per 10  $\mu\text{g}/\text{m}^3$  increase in  $\text{PM}_{2.5}$ .

| Model             | Mean HR (95% CI)     |
|-------------------|----------------------|
| not stratified    | 1.335 (1.181, 1.508) |
| sex: male         | 1.348 (1.160, 1.568) |
| sex: female       | 1.326 (1.091, 1.611) |
| race: white       | 1.319 (1.104, 1.576) |
| race: black       | 1.389 (1.159, 1.664) |
| race: other       | 1.259 (0.825, 1.923) |
| pop: urban        | 1.246 (1.046, 1.486) |
| pop: non-urban    | 1.428 (1.221, 1.670) |
| HFdiag: low tert  | 1.240 (0.943, 1.632) |
| HFdiag: mid tert  | 1.602 (1.394, 1.840) |
| HFdiag: high tert | 1.080 (0.823, 1.417) |
| betablock: no     | 1.350 (1.194, 1.526) |
| betablock: yes    | 0.960 (0.395, 2.334) |

62  
63 Supplemental Table 4. The hazard ratio (HR, 95%CI) for an early-readmission for any cause  
64 with respect to time since HF diagnosis for the main unstratified model and stratified by sex,  
65 race, urbanicity, and beta blocker prescription. HRs were evaluated at different times since HF  
66 diagnosis by using 120-day rolling windows that were incremented in 10 day intervals. The

67 median percent urbanicity (86% urban) was used as a cut off to examine readmission hazards  
 68 in non-urban (below) and urban (above) strata. HR is expressed per 10  $\mu\text{g}/\text{m}^3$  increase in  $\text{PM}_{2.5}$ .

| model          | time_HFdiag | Mean HR (95% CI)     |
|----------------|-------------|----------------------|
| Not stratified | 10          | 1.022 (0.995, 1.050) |
| Not stratified | 20          | 1.022 (0.996, 1.048) |
| Not stratified | 30          | 1.020 (0.994, 1.046) |
| Not stratified | 40          | 1.021 (0.997, 1.046) |
| Not stratified | 50          | 1.018 (0.992, 1.044) |
| Not stratified | 60          | 1.017 (0.992, 1.043) |
| Not stratified | 70          | 1.013 (0.981, 1.046) |
| Not stratified | 80          | 0.995 (0.955, 1.036) |
| Not stratified | 90          | 1.003 (0.968, 1.040) |
| Not stratified | 100         | 1.013 (0.980, 1.048) |
| Not stratified | 110         | 1.015 (0.985, 1.046) |
| Not stratified | 120         | 1.019 (0.992, 1.047) |
| Not stratified | 130         | 1.032 (1.008, 1.057) |
| Not stratified | 140         | 1.037 (1.011, 1.064) |
| Not stratified | 150         | 1.056 (1.026, 1.087) |
| Not stratified | 160         | 1.053 (1.020, 1.087) |
| Not stratified | 170         | 1.062 (1.033, 1.091) |
| Not stratified | 180         | 1.069 (1.041, 1.097) |
| Not stratified | 190         | 1.069 (1.040, 1.098) |
| Not stratified | 200         | 1.073 (1.046, 1.101) |
| Not stratified | 210         | 1.069 (1.040, 1.098) |
| Not stratified | 220         | 1.065 (1.031, 1.100) |
| Not stratified | 230         | 1.069 (1.035, 1.105) |
| Not stratified | 240         | 1.076 (1.036, 1.117) |
| Not stratified | 250         | 1.067 (1.023, 1.112) |
| Not stratified | 260         | 1.074 (1.036, 1.113) |
| Not stratified | 270         | 1.074 (1.031, 1.120) |
| Not stratified | 280         | 1.078 (1.035, 1.123) |
| Not stratified | 290         | 1.057 (1.024, 1.090) |
| Not stratified | 300         | 1.050 (1.019, 1.081) |
| Not stratified | 310         | 1.051 (1.021, 1.082) |
| Not stratified | 320         | 1.051 (1.022, 1.080) |
| Not stratified | 330         | 1.055 (1.025, 1.085) |
| Not stratified | 340         | 1.051 (1.022, 1.081) |
| Not stratified | 350         | 1.053 (1.024, 1.083) |
| Not stratified | 360         | 1.048 (1.015, 1.082) |
| Not stratified | 370         | 1.040 (1.008, 1.074) |
| Not stratified | 380         | 1.042 (1.006, 1.079) |
| Not stratified | 390         | 1.040 (1.008, 1.072) |
| Not stratified | 400         | 1.047 (1.019, 1.076) |

|                |     |                      |
|----------------|-----|----------------------|
| Not stratified | 410 | 1.047 (1.015, 1.079) |
| Not stratified | 420 | 1.060 (1.030, 1.090) |
| Not stratified | 430 | 1.063 (1.034, 1.093) |
| Not stratified | 440 | 1.060 (1.023, 1.098) |
| Not stratified | 450 | 1.057 (1.023, 1.092) |
| Not stratified | 460 | 1.058 (1.023, 1.093) |
| Not stratified | 470 | 1.053 (1.021, 1.085) |
| Not stratified | 480 | 1.051 (1.016, 1.088) |
| Not stratified | 490 | 1.058 (1.025, 1.092) |
| Not stratified | 500 | 1.050 (1.012, 1.089) |
| Not stratified | 510 | 1.060 (1.026, 1.096) |
| Not stratified | 520 | 1.063 (1.023, 1.104) |
| Not stratified | 530 | 1.056 (1.005, 1.109) |
| Not stratified | 540 | 1.037 (0.967, 1.113) |
| Not stratified | 550 | 1.019 (0.952, 1.091) |
| Not stratified | 560 | 1.008 (0.947, 1.073) |
| Not stratified | 570 | 1.018 (0.958, 1.082) |
| Not stratified | 580 | 1.019 (0.960, 1.081) |
| Not stratified | 590 | 1.032 (0.973, 1.094) |
| Not stratified | 600 | 1.033 (0.971, 1.099) |
| Not stratified | 610 | 1.056 (0.989, 1.128) |
| Not stratified | 620 | 1.058 (0.990, 1.130) |
| Not stratified | 630 | 1.029 (0.975, 1.087) |
| Not stratified | 640 | 1.019 (0.957, 1.085) |
| Not stratified | 650 | 1.019 (0.960, 1.081) |
| Not stratified | 660 | 1.021 (0.959, 1.087) |
| Not stratified | 670 | 1.015 (0.946, 1.089) |
| Not stratified | 680 | 1.029 (0.964, 1.098) |
| Not stratified | 690 | 1.016 (0.934, 1.105) |
| Not stratified | 700 | 1.021 (0.946, 1.103) |
| Not stratified | 710 | 1.009 (0.937, 1.086) |
| Not stratified | 720 | 1.014 (0.942, 1.091) |
| Not stratified | 730 | 0.977 (0.908, 1.052) |
| Not stratified | 740 | 0.976 (0.913, 1.044) |
| Not stratified | 750 | 0.990 (0.925, 1.060) |
| Not stratified | 760 | 1.004 (0.942, 1.070) |
| Not stratified | 770 | 0.997 (0.931, 1.068) |
| Not stratified | 780 | 1.016 (0.949, 1.088) |
| Not stratified | 790 | 1.026 (0.962, 1.094) |
| Not stratified | 800 | 1.011 (0.939, 1.087) |
| Not stratified | 810 | 1.015 (0.940, 1.097) |
| Not stratified | 820 | 1.008 (0.929, 1.093) |
| Not stratified | 830 | 1.007 (0.923, 1.098) |

|                |     |                      |
|----------------|-----|----------------------|
| Not stratified | 840 | 1.032 (0.950, 1.120) |
| Not stratified | 850 | 1.028 (0.951, 1.112) |
| Not stratified | 860 | 1.034 (0.959, 1.115) |
| Not stratified | 870 | 1.031 (0.948, 1.123) |
| Not stratified | 880 | 0.994 (0.897, 1.102) |
| Not stratified | 890 | 1.018 (0.953, 1.088) |
| Not stratified | 900 | 1.008 (0.978, 1.039) |
| Sex: Male      | 10  | 1.031 (1.001, 1.062) |
| Sex: Male      | 20  | 1.028 (0.998, 1.058) |
| Sex: Male      | 30  | 1.026 (0.995, 1.057) |
| Sex: Male      | 40  | 1.024 (0.994, 1.056) |
| Sex: Male      | 50  | 1.022 (0.990, 1.055) |
| Sex: Male      | 60  | 1.020 (0.988, 1.052) |
| Sex: Male      | 70  | 1.008 (0.959, 1.061) |
| Sex: Male      | 80  | 0.993 (0.935, 1.054) |
| Sex: Male      | 90  | 0.986 (0.929, 1.046) |
| Sex: Male      | 100 | 1.001 (0.953, 1.053) |
| Sex: Male      | 110 | 1.010 (0.971, 1.051) |
| Sex: Male      | 120 | 1.013 (0.978, 1.050) |
| Sex: Male      | 130 | 1.025 (0.998, 1.054) |
| Sex: Male      | 140 | 1.044 (1.013, 1.076) |
| Sex: Male      | 150 | 1.043 (1.010, 1.078) |
| Sex: Male      | 160 | 1.035 (1.001, 1.071) |
| Sex: Male      | 170 | 1.038 (1.007, 1.070) |
| Sex: Male      | 180 | 1.049 (1.018, 1.082) |
| Sex: Male      | 190 | 1.044 (1.012, 1.078) |
| Sex: Male      | 200 | 1.051 (1.017, 1.085) |
| Sex: Male      | 210 | 1.043 (1.008, 1.078) |
| Sex: Male      | 220 | 1.031 (0.986, 1.079) |
| Sex: Male      | 230 | 1.029 (0.965, 1.098) |
| Sex: Male      | 240 | 1.043 (0.972, 1.119) |
| Sex: Male      | 250 | 0.999 (0.904, 1.105) |
| Sex: Male      | 260 | 0.963 (0.829, 1.119) |
| Sex: Male      | 270 | 1.012 (0.892, 1.149) |
| Sex: Male      | 280 | 1.011 (0.887, 1.151) |
| Sex: Male      | 290 | 1.018 (0.906, 1.143) |
| Sex: Male      | 300 | 0.997 (0.879, 1.131) |
| Sex: Male      | 310 | 1.062 (0.973, 1.159) |
| Sex: Male      | 320 | 1.062 (0.986, 1.144) |
| Sex: Male      | 330 | 1.079 (0.999, 1.165) |
| Sex: Male      | 340 | 1.062 (0.984, 1.147) |
| Sex: Male      | 350 | 1.060 (0.982, 1.146) |
| Sex: Male      | 360 | 1.037 (0.955, 1.125) |

|           |     |                      |
|-----------|-----|----------------------|
| Sex: Male | 370 | 1.045 (0.983, 1.110) |
| Sex: Male | 380 | 1.051 (0.996, 1.108) |
| Sex: Male | 390 | 1.045 (0.995, 1.097) |
| Sex: Male | 400 | 1.062 (1.022, 1.103) |
| Sex: Male | 410 | 1.056 (1.016, 1.098) |
| Sex: Male | 420 | 1.072 (1.036, 1.110) |
| Sex: Male | 430 | 1.070 (1.035, 1.107) |
| Sex: Male | 440 | 1.075 (1.031, 1.121) |
| Sex: Male | 450 | 1.073 (1.032, 1.116) |
| Sex: Male | 460 | 1.073 (1.031, 1.116) |
| Sex: Male | 470 | 1.075 (1.036, 1.115) |
| Sex: Male | 480 | 1.076 (1.029, 1.125) |
| Sex: Male | 490 | 1.098 (1.043, 1.157) |
| Sex: Male | 500 | 1.078 (1.003, 1.158) |
| Sex: Male | 510 | 1.087 (1.009, 1.170) |
| Sex: Male | 520 | 1.085 (1.005, 1.172) |
| Sex: Male | 530 | 1.062 (0.977, 1.154) |
| Sex: Male | 540 | 1.027 (0.929, 1.136) |
| Sex: Male | 550 | 0.986 (0.888, 1.095) |
| Sex: Male | 560 | 0.977 (0.888, 1.075) |
| Sex: Male | 570 | 0.981 (0.901, 1.067) |
| Sex: Male | 580 | 0.988 (0.919, 1.063) |
| Sex: Male | 590 | 1.015 (0.938, 1.098) |
| Sex: Male | 600 | 1.003 (0.926, 1.086) |
| Sex: Male | 610 | 1.053 (0.962, 1.152) |
| Sex: Male | 620 | 1.059 (0.969, 1.156) |
| Sex: Male | 630 | 1.040 (0.972, 1.112) |
| Sex: Male | 640 | 1.025 (0.943, 1.114) |
| Sex: Male | 650 | 1.032 (0.957, 1.114) |
| Sex: Male | 660 | 1.027 (0.946, 1.114) |
| Sex: Male | 670 | 1.016 (0.928, 1.114) |
| Sex: Male | 680 | 1.031 (0.947, 1.122) |
| Sex: Male | 690 | 1.036 (0.914, 1.175) |
| Sex: Male | 700 | 1.045 (0.930, 1.173) |
| Sex: Male | 710 | 1.022 (0.910, 1.148) |
| Sex: Male | 720 | 1.040 (0.925, 1.170) |
| Sex: Male | 730 | 0.958 (0.854, 1.074) |
| Sex: Male | 740 | 0.970 (0.868, 1.084) |
| Sex: Male | 750 | 1.015 (0.920, 1.120) |
| Sex: Male | 760 | 1.036 (0.945, 1.135) |
| Sex: Male | 770 | 1.038 (0.944, 1.143) |
| Sex: Male | 780 | 1.062 (0.961, 1.174) |
| Sex: Male | 790 | 1.080 (1.018, 1.145) |

|             |     |                      |
|-------------|-----|----------------------|
| Sex: Male   | 800 | 1.071 (1.004, 1.143) |
| Sex: Male   | 810 | 1.090 (1.025, 1.160) |
| Sex: Male   | 820 | 1.085 (1.025, 1.150) |
| Sex: Male   | 830 | 1.083 (1.025, 1.145) |
| Sex: Male   | 840 | 1.078 (1.021, 1.138) |
| Sex: Male   | 850 | 1.067 (1.008, 1.128) |
| Sex: Male   | 860 | 1.069 (1.003, 1.140) |
| Sex: Male   | 870 | 1.061 (0.988, 1.138) |
| Sex: Male   | 880 | 1.038 (0.949, 1.134) |
| Sex: Male   | 890 | 1.052 (0.976, 1.134) |
| Sex: Male   | 900 | 1.016 (0.977, 1.056) |
| Sex: Female | 10  | 1.011 (0.967, 1.058) |
| Sex: Female | 20  | 1.014 (0.971, 1.059) |
| Sex: Female | 30  | 1.014 (0.972, 1.057) |
| Sex: Female | 40  | 1.019 (0.980, 1.059) |
| Sex: Female | 50  | 1.013 (0.973, 1.056) |
| Sex: Female | 60  | 1.015 (0.975, 1.056) |
| Sex: Female | 70  | 1.019 (0.978, 1.062) |
| Sex: Female | 80  | 0.999 (0.943, 1.059) |
| Sex: Female | 90  | 1.025 (0.983, 1.068) |
| Sex: Female | 100 | 1.030 (0.985, 1.078) |
| Sex: Female | 110 | 1.021 (0.974, 1.071) |
| Sex: Female | 120 | 1.029 (0.987, 1.072) |
| Sex: Female | 130 | 1.041 (0.996, 1.087) |
| Sex: Female | 140 | 1.030 (0.981, 1.082) |
| Sex: Female | 150 | 1.063 (1.012, 1.116) |
| Sex: Female | 160 | 1.062 (1.005, 1.121) |
| Sex: Female | 170 | 1.076 (1.026, 1.129) |
| Sex: Female | 180 | 1.080 (1.030, 1.134) |
| Sex: Female | 190 | 1.091 (1.031, 1.154) |
| Sex: Female | 200 | 1.087 (1.044, 1.133) |
| Sex: Female | 210 | 1.086 (1.039, 1.134) |
| Sex: Female | 220 | 1.080 (1.031, 1.131) |
| Sex: Female | 230 | 1.086 (1.041, 1.133) |
| Sex: Female | 240 | 1.091 (1.038, 1.145) |
| Sex: Female | 250 | 1.087 (1.037, 1.140) |
| Sex: Female | 260 | 1.109 (1.065, 1.155) |
| Sex: Female | 270 | 1.111 (1.053, 1.172) |
| Sex: Female | 280 | 1.124 (1.063, 1.189) |
| Sex: Female | 290 | 1.067 (1.028, 1.108) |
| Sex: Female | 300 | 1.060 (1.024, 1.098) |
| Sex: Female | 310 | 1.047 (1.013, 1.081) |
| Sex: Female | 320 | 1.047 (1.013, 1.082) |

|             |     |                      |
|-------------|-----|----------------------|
| Sex: Female | 330 | 1.046 (1.012, 1.082) |
| Sex: Female | 340 | 1.046 (1.012, 1.082) |
| Sex: Female | 350 | 1.048 (1.012, 1.084) |
| Sex: Female | 360 | 1.041 (1.003, 1.080) |
| Sex: Female | 370 | 1.032 (0.994, 1.071) |
| Sex: Female | 380 | 1.029 (0.985, 1.074) |
| Sex: Female | 390 | 1.029 (0.989, 1.070) |
| Sex: Female | 400 | 1.028 (0.990, 1.068) |
| Sex: Female | 410 | 1.033 (0.977, 1.092) |
| Sex: Female | 420 | 1.030 (0.965, 1.099) |
| Sex: Female | 430 | 1.045 (0.979, 1.114) |
| Sex: Female | 440 | 1.027 (0.929, 1.137) |
| Sex: Female | 450 | 1.021 (0.911, 1.145) |
| Sex: Female | 460 | 1.026 (0.923, 1.140) |
| Sex: Female | 470 | 1.014 (0.920, 1.117) |
| Sex: Female | 480 | 1.007 (0.915, 1.107) |
| Sex: Female | 490 | 1.026 (0.959, 1.098) |
| Sex: Female | 500 | 1.033 (0.972, 1.098) |
| Sex: Female | 510 | 1.059 (1.006, 1.115) |
| Sex: Female | 520 | 1.059 (1.002, 1.119) |
| Sex: Female | 530 | 1.060 (1.000, 1.123) |
| Sex: Female | 540 | 1.058 (0.957, 1.171) |
| Sex: Female | 550 | 1.046 (0.964, 1.136) |
| Sex: Female | 560 | 1.036 (0.961, 1.116) |
| Sex: Female | 570 | 1.063 (0.982, 1.151) |
| Sex: Female | 580 | 1.059 (0.969, 1.158) |
| Sex: Female | 590 | 1.073 (0.975, 1.180) |
| Sex: Female | 600 | 1.094 (0.992, 1.208) |
| Sex: Female | 610 | 1.077 (0.973, 1.193) |
| Sex: Female | 620 | 1.079 (0.976, 1.193) |
| Sex: Female | 630 | 1.018 (0.945, 1.095) |
| Sex: Female | 640 | 1.016 (0.949, 1.088) |
| Sex: Female | 650 | 1.012 (0.948, 1.079) |
| Sex: Female | 660 | 1.008 (0.950, 1.070) |
| Sex: Female | 670 | 1.016 (0.941, 1.097) |
| Sex: Female | 680 | 1.045 (0.964, 1.133) |
| Sex: Female | 690 | 1.013 (0.928, 1.106) |
| Sex: Female | 700 | 1.003 (0.911, 1.104) |
| Sex: Female | 710 | 0.988 (0.899, 1.086) |
| Sex: Female | 720 | 0.981 (0.880, 1.093) |
| Sex: Female | 730 | 0.992 (0.898, 1.095) |
| Sex: Female | 740 | 0.965 (0.877, 1.061) |
| Sex: Female | 750 | 0.915 (0.803, 1.043) |

|                   |     |                      |
|-------------------|-----|----------------------|
| Sex: Female       | 760 | 0.921 (0.806, 1.053) |
| Sex: Female       | 770 | 0.924 (0.826, 1.035) |
| Sex: Female       | 780 | 0.927 (0.829, 1.037) |
| Sex: Female       | 790 | 0.926 (0.841, 1.019) |
| Sex: Female       | 800 | 0.906 (0.805, 1.018) |
| Sex: Female       | 810 | 0.886 (0.778, 1.010) |
| Sex: Female       | 820 | 0.884 (0.775, 1.009) |
| Sex: Female       | 830 | 0.883 (0.777, 1.003) |
| Sex: Female       | 840 | 0.925 (0.799, 1.071) |
| Sex: Female       | 850 | 0.951 (0.812, 1.113) |
| Sex: Female       | 860 | 0.959 (0.828, 1.110) |
| Sex: Female       | 870 | 0.975 (0.860, 1.105) |
| Sex: Female       | 880 | 0.957 (0.842, 1.088) |
| Sex: Female       | 890 | 0.961 (0.837, 1.103) |
| Sex: Female       | 900 | 0.999 (0.956, 1.044) |
| Urbanicity: Urban | 10  | 1.016 (0.976, 1.058) |
| Urbanicity: Urban | 20  | 1.014 (0.976, 1.052) |
| Urbanicity: Urban | 30  | 1.015 (0.979, 1.053) |
| Urbanicity: Urban | 40  | 1.017 (0.982, 1.054) |
| Urbanicity: Urban | 50  | 1.013 (0.976, 1.051) |
| Urbanicity: Urban | 60  | 1.011 (0.974, 1.048) |
| Urbanicity: Urban | 70  | 0.995 (0.946, 1.047) |
| Urbanicity: Urban | 80  | 0.991 (0.941, 1.045) |
| Urbanicity: Urban | 90  | 0.999 (0.946, 1.054) |
| Urbanicity: Urban | 100 | 1.013 (0.969, 1.059) |
| Urbanicity: Urban | 110 | 1.010 (0.970, 1.052) |
| Urbanicity: Urban | 120 | 1.015 (0.979, 1.053) |
| Urbanicity: Urban | 130 | 1.025 (0.991, 1.059) |
| Urbanicity: Urban | 140 | 1.044 (1.008, 1.081) |
| Urbanicity: Urban | 150 | 1.033 (0.990, 1.079) |
| Urbanicity: Urban | 160 | 1.019 (0.970, 1.070) |
| Urbanicity: Urban | 170 | 1.031 (0.991, 1.073) |
| Urbanicity: Urban | 180 | 1.044 (1.009, 1.079) |
| Urbanicity: Urban | 190 | 1.043 (1.010, 1.077) |
| Urbanicity: Urban | 200 | 1.042 (1.009, 1.076) |
| Urbanicity: Urban | 210 | 1.036 (0.998, 1.074) |
| Urbanicity: Urban | 220 | 1.026 (0.982, 1.072) |
| Urbanicity: Urban | 230 | 1.028 (0.986, 1.072) |
| Urbanicity: Urban | 240 | 1.030 (0.983, 1.081) |
| Urbanicity: Urban | 250 | 1.015 (0.962, 1.071) |
| Urbanicity: Urban | 260 | 1.006 (0.943, 1.074) |
| Urbanicity: Urban | 270 | 1.037 (0.969, 1.109) |
| Urbanicity: Urban | 280 | 1.048 (0.979, 1.122) |



|                   |     |                      |
|-------------------|-----|----------------------|
| Urbanicity: Urban | 290 | 1.042 (0.996, 1.090) |
| Urbanicity: Urban | 300 | 1.036 (0.991, 1.082) |
| Urbanicity: Urban | 310 | 1.043 (1.004, 1.084) |
| Urbanicity: Urban | 320 | 1.040 (0.996, 1.086) |
| Urbanicity: Urban | 330 | 1.051 (1.010, 1.094) |
| Urbanicity: Urban | 340 | 1.051 (1.009, 1.094) |
| Urbanicity: Urban | 350 | 1.052 (1.011, 1.096) |
| Urbanicity: Urban | 360 | 1.048 (1.000, 1.098) |
| Urbanicity: Urban | 370 | 1.042 (0.998, 1.088) |
| Urbanicity: Urban | 380 | 1.051 (1.003, 1.101) |
| Urbanicity: Urban | 390 | 1.048 (1.009, 1.089) |
| Urbanicity: Urban | 400 | 1.057 (1.018, 1.097) |
| Urbanicity: Urban | 410 | 1.053 (1.010, 1.098) |
| Urbanicity: Urban | 420 | 1.053 (1.014, 1.094) |
| Urbanicity: Urban | 430 | 1.052 (1.015, 1.089) |
| Urbanicity: Urban | 440 | 1.058 (1.017, 1.101) |
| Urbanicity: Urban | 450 | 1.052 (1.016, 1.090) |
| Urbanicity: Urban | 460 | 1.049 (1.008, 1.091) |
| Urbanicity: Urban | 470 | 1.049 (1.006, 1.092) |
| Urbanicity: Urban | 480 | 1.054 (1.015, 1.094) |
| Urbanicity: Urban | 490 | 1.041 (0.982, 1.105) |
| Urbanicity: Urban | 500 | 1.045 (0.995, 1.098) |
| Urbanicity: Urban | 510 | 1.052 (1.002, 1.105) |
| Urbanicity: Urban | 520 | 1.039 (0.984, 1.097) |
| Urbanicity: Urban | 530 | 1.018 (0.937, 1.105) |
| Urbanicity: Urban | 540 | 0.957 (0.870, 1.051) |
| Urbanicity: Urban | 550 | 0.966 (0.886, 1.053) |
| Urbanicity: Urban | 560 | 0.962 (0.886, 1.045) |
| Urbanicity: Urban | 570 | 0.967 (0.891, 1.050) |
| Urbanicity: Urban | 580 | 0.970 (0.902, 1.043) |
| Urbanicity: Urban | 590 | 0.973 (0.904, 1.047) |
| Urbanicity: Urban | 600 | 0.959 (0.889, 1.034) |
| Urbanicity: Urban | 610 | 1.001 (0.897, 1.116) |
| Urbanicity: Urban | 620 | 1.007 (0.895, 1.133) |
| Urbanicity: Urban | 630 | 0.991 (0.885, 1.110) |
| Urbanicity: Urban | 640 | 0.980 (0.866, 1.109) |
| Urbanicity: Urban | 650 | 0.979 (0.870, 1.100) |
| Urbanicity: Urban | 660 | 0.981 (0.866, 1.110) |
| Urbanicity: Urban | 670 | 0.980 (0.859, 1.117) |
| Urbanicity: Urban | 680 | 0.997 (0.872, 1.140) |
| Urbanicity: Urban | 690 | 0.990 (0.851, 1.151) |
| Urbanicity: Urban | 700 | 0.989 (0.861, 1.137) |
| Urbanicity: Urban | 710 | 0.981 (0.863, 1.115) |

|                       |     |                      |
|-----------------------|-----|----------------------|
| Urbanicity: Urban     | 720 | 0.992 (0.884, 1.113) |
| Urbanicity: Urban     | 730 | 0.936 (0.843, 1.039) |
| Urbanicity: Urban     | 740 | 0.950 (0.869, 1.038) |
| Urbanicity: Urban     | 750 | 0.975 (0.898, 1.058) |
| Urbanicity: Urban     | 760 | 0.995 (0.931, 1.064) |
| Urbanicity: Urban     | 770 | 0.995 (0.924, 1.072) |
| Urbanicity: Urban     | 780 | 1.015 (0.941, 1.093) |
| Urbanicity: Urban     | 790 | 1.025 (0.950, 1.106) |
| Urbanicity: Urban     | 800 | 1.027 (0.954, 1.107) |
| Urbanicity: Urban     | 810 | 1.036 (0.957, 1.121) |
| Urbanicity: Urban     | 820 | 1.039 (0.969, 1.115) |
| Urbanicity: Urban     | 830 | 1.037 (0.965, 1.113) |
| Urbanicity: Urban     | 840 | 1.060 (1.002, 1.121) |
| Urbanicity: Urban     | 850 | 1.054 (0.998, 1.114) |
| Urbanicity: Urban     | 860 | 1.056 (0.994, 1.121) |
| Urbanicity: Urban     | 870 | 1.069 (1.007, 1.134) |
| Urbanicity: Urban     | 880 | 1.055 (0.975, 1.142) |
| Urbanicity: Urban     | 890 | 1.068 (0.994, 1.147) |
| Urbanicity: Urban     | 900 | 1.011 (0.973, 1.052) |
| Urbanicity: Non-Urban | 10  | 1.029 (0.993, 1.066) |
| Urbanicity: Non-Urban | 20  | 1.031 (0.996, 1.066) |
| Urbanicity: Non-Urban | 30  | 1.026 (0.989, 1.063) |
| Urbanicity: Non-Urban | 40  | 1.026 (0.992, 1.061) |
| Urbanicity: Non-Urban | 50  | 1.024 (0.988, 1.061) |
| Urbanicity: Non-Urban | 60  | 1.025 (0.992, 1.060) |
| Urbanicity: Non-Urban | 70  | 1.027 (0.990, 1.066) |
| Urbanicity: Non-Urban | 80  | 0.995 (0.934, 1.060) |
| Urbanicity: Non-Urban | 90  | 1.008 (0.963, 1.054) |
| Urbanicity: Non-Urban | 100 | 1.010 (0.964, 1.057) |
| Urbanicity: Non-Urban | 110 | 1.013 (0.973, 1.055) |
| Urbanicity: Non-Urban | 120 | 1.016 (0.981, 1.052) |
| Urbanicity: Non-Urban | 130 | 1.031 (0.999, 1.065) |
| Urbanicity: Non-Urban | 140 | 1.027 (0.992, 1.063) |
| Urbanicity: Non-Urban | 150 | 1.067 (1.019, 1.118) |
| Urbanicity: Non-Urban | 160 | 1.078 (1.022, 1.137) |
| Urbanicity: Non-Urban | 170 | 1.090 (1.038, 1.145) |
| Urbanicity: Non-Urban | 180 | 1.094 (1.039, 1.152) |
| Urbanicity: Non-Urban | 190 | 1.110 (1.054, 1.168) |
| Urbanicity: Non-Urban | 200 | 1.130 (1.072, 1.192) |
| Urbanicity: Non-Urban | 210 | 1.140 (1.081, 1.201) |
| Urbanicity: Non-Urban | 220 | 1.135 (1.073, 1.202) |
| Urbanicity: Non-Urban | 230 | 1.161 (1.077, 1.252) |
| Urbanicity: Non-Urban | 240 | 1.217 (1.124, 1.317) |

|                       |     |                      |
|-----------------------|-----|----------------------|
| Urbanicity: Non-Urban | 250 | 1.205 (1.101, 1.319) |
| Urbanicity: Non-Urban | 260 | 1.220 (1.120, 1.330) |
| Urbanicity: Non-Urban | 270 | 1.169 (1.096, 1.247) |
| Urbanicity: Non-Urban | 280 | 1.180 (1.066, 1.307) |
| Urbanicity: Non-Urban | 290 | 1.143 (1.027, 1.272) |
| Urbanicity: Non-Urban | 300 | 1.128 (1.021, 1.245) |
| Urbanicity: Non-Urban | 310 | 1.125 (1.021, 1.240) |
| Urbanicity: Non-Urban | 320 | 1.092 (1.029, 1.159) |
| Urbanicity: Non-Urban | 330 | 1.087 (1.026, 1.152) |
| Urbanicity: Non-Urban | 340 | 1.074 (1.014, 1.137) |
| Urbanicity: Non-Urban | 350 | 1.073 (1.014, 1.135) |
| Urbanicity: Non-Urban | 360 | 1.060 (0.994, 1.130) |
| Urbanicity: Non-Urban | 370 | 1.029 (0.965, 1.098) |
| Urbanicity: Non-Urban | 380 | 0.995 (0.897, 1.103) |
| Urbanicity: Non-Urban | 390 | 0.981 (0.879, 1.095) |
| Urbanicity: Non-Urban | 400 | 0.994 (0.903, 1.094) |
| Urbanicity: Non-Urban | 410 | 1.011 (0.932, 1.097) |
| Urbanicity: Non-Urban | 420 | 1.050 (0.982, 1.123) |
| Urbanicity: Non-Urban | 430 | 1.059 (0.998, 1.123) |
| Urbanicity: Non-Urban | 440 | 1.040 (0.959, 1.128) |
| Urbanicity: Non-Urban | 450 | 1.044 (0.969, 1.126) |
| Urbanicity: Non-Urban | 460 | 1.056 (0.985, 1.133) |
| Urbanicity: Non-Urban | 470 | 1.055 (0.991, 1.124) |
| Urbanicity: Non-Urban | 480 | 1.041 (0.971, 1.117) |
| Urbanicity: Non-Urban | 490 | 1.080 (1.031, 1.132) |
| Urbanicity: Non-Urban | 500 | 1.058 (0.995, 1.126) |
| Urbanicity: Non-Urban | 510 | 1.077 (1.020, 1.137) |
| Urbanicity: Non-Urban | 520 | 1.089 (1.022, 1.161) |
| Urbanicity: Non-Urban | 530 | 1.116 (1.014, 1.227) |
| Urbanicity: Non-Urban | 540 | 1.118 (1.014, 1.232) |
| Urbanicity: Non-Urban | 550 | 1.080 (0.981, 1.190) |
| Urbanicity: Non-Urban | 560 | 1.057 (0.968, 1.154) |
| Urbanicity: Non-Urban | 570 | 1.071 (0.977, 1.173) |
| Urbanicity: Non-Urban | 580 | 1.074 (0.975, 1.183) |
| Urbanicity: Non-Urban | 590 | 1.110 (1.005, 1.224) |
| Urbanicity: Non-Urban | 600 | 1.121 (1.008, 1.246) |
| Urbanicity: Non-Urban | 610 | 1.118 (1.006, 1.243) |
| Urbanicity: Non-Urban | 620 | 1.133 (1.010, 1.270) |
| Urbanicity: Non-Urban | 630 | 1.098 (0.987, 1.223) |
| Urbanicity: Non-Urban | 640 | 1.064 (0.974, 1.162) |
| Urbanicity: Non-Urban | 650 | 1.058 (0.970, 1.154) |
| Urbanicity: Non-Urban | 660 | 1.055 (0.968, 1.150) |
| Urbanicity: Non-Urban | 670 | 1.073 (0.979, 1.176) |

|                       |     |                      |
|-----------------------|-----|----------------------|
| Urbanicity: Non-Urban | 680 | 1.093 (0.989, 1.207) |
| Urbanicity: Non-Urban | 690 | 1.042 (0.910, 1.193) |
| Urbanicity: Non-Urban | 700 | 1.060 (0.939, 1.196) |
| Urbanicity: Non-Urban | 710 | 1.038 (0.924, 1.167) |
| Urbanicity: Non-Urban | 720 | 1.046 (0.918, 1.192) |
| Urbanicity: Non-Urban | 730 | 1.031 (0.902, 1.179) |
| Urbanicity: Non-Urban | 740 | 1.016 (0.890, 1.160) |
| Urbanicity: Non-Urban | 750 | 1.015 (0.869, 1.185) |
| Urbanicity: Non-Urban | 760 | 1.100 (0.961, 1.259) |
| Urbanicity: Non-Urban | 770 | 1.068 (0.898, 1.271) |
| Urbanicity: Non-Urban | 780 | 1.078 (0.922, 1.261) |
| Urbanicity: Non-Urban | 790 | 1.098 (0.953, 1.265) |
| Urbanicity: Non-Urban | 800 | 0.993 (0.808, 1.221) |
| Urbanicity: Non-Urban | 810 | 0.928 (0.755, 1.139) |
| Urbanicity: Non-Urban | 820 | 0.885 (0.735, 1.066) |
| Urbanicity: Non-Urban | 830 | 0.879 (0.722, 1.069) |
| Urbanicity: Non-Urban | 840 | 0.879 (0.719, 1.075) |
| Urbanicity: Non-Urban | 850 | 0.830 (0.669, 1.030) |
| Urbanicity: Non-Urban | 860 | 0.890 (0.745, 1.064) |
| Urbanicity: Non-Urban | 870 | 0.878 (0.736, 1.047) |
| Urbanicity: Non-Urban | 880 | 0.879 (0.762, 1.013) |
| Urbanicity: Non-Urban | 890 | 0.883 (0.763, 1.022) |
| Urbanicity: Non-Urban | 900 | 1.004 (0.960, 1.051) |
| Race: White           | 10  | 1.015 (0.980, 1.052) |
| Race: White           | 20  | 1.016 (0.983, 1.051) |
| Race: White           | 30  | 1.014 (0.981, 1.048) |
| Race: White           | 40  | 1.016 (0.984, 1.048) |
| Race: White           | 50  | 1.014 (0.982, 1.047) |
| Race: White           | 60  | 1.013 (0.981, 1.046) |
| Race: White           | 70  | 1.006 (0.967, 1.046) |
| Race: White           | 80  | 0.984 (0.935, 1.035) |
| Race: White           | 90  | 0.997 (0.952, 1.043) |
| Race: White           | 100 | 1.003 (0.962, 1.045) |
| Race: White           | 110 | 1.006 (0.972, 1.042) |
| Race: White           | 120 | 1.012 (0.982, 1.043) |
| Race: White           | 130 | 1.018 (0.990, 1.047) |
| Race: White           | 140 | 1.017 (0.986, 1.050) |
| Race: White           | 150 | 1.048 (1.008, 1.089) |
| Race: White           | 160 | 1.048 (1.009, 1.089) |
| Race: White           | 170 | 1.053 (1.016, 1.092) |
| Race: White           | 180 | 1.061 (1.026, 1.098) |
| Race: White           | 190 | 1.067 (1.030, 1.105) |
| Race: White           | 200 | 1.071 (1.036, 1.107) |

|             |     |                      |
|-------------|-----|----------------------|
| Race: White | 210 | 1.069 (1.033, 1.106) |
| Race: White | 220 | 1.065 (1.026, 1.105) |
| Race: White | 230 | 1.068 (1.029, 1.107) |
| Race: White | 240 | 1.079 (1.030, 1.131) |
| Race: White | 250 | 1.082 (1.033, 1.133) |
| Race: White | 260 | 1.081 (1.033, 1.131) |
| Race: White | 270 | 1.075 (1.020, 1.133) |
| Race: White | 280 | 1.095 (1.026, 1.170) |
| Race: White | 290 | 1.079 (1.012, 1.151) |
| Race: White | 300 | 1.075 (1.011, 1.144) |
| Race: White | 310 | 1.087 (1.022, 1.156) |
| Race: White | 320 | 1.085 (1.015, 1.161) |
| Race: White | 330 | 1.089 (1.016, 1.168) |
| Race: White | 340 | 1.076 (1.004, 1.154) |
| Race: White | 350 | 1.072 (0.997, 1.152) |
| Race: White | 360 | 1.057 (0.987, 1.132) |
| Race: White | 370 | 1.057 (0.988, 1.130) |
| Race: White | 380 | 1.065 (0.991, 1.144) |
| Race: White | 390 | 1.048 (0.984, 1.117) |
| Race: White | 400 | 1.057 (1.002, 1.115) |
| Race: White | 410 | 1.031 (0.976, 1.090) |
| Race: White | 420 | 1.050 (1.001, 1.102) |
| Race: White | 430 | 1.045 (0.995, 1.097) |
| Race: White | 440 | 1.047 (0.992, 1.105) |
| Race: White | 450 | 1.050 (1.001, 1.102) |
| Race: White | 460 | 1.057 (1.011, 1.104) |
| Race: White | 470 | 1.058 (1.017, 1.100) |
| Race: White | 480 | 1.055 (1.004, 1.109) |
| Race: White | 490 | 1.045 (0.996, 1.096) |
| Race: White | 500 | 1.039 (0.990, 1.089) |
| Race: White | 510 | 1.054 (1.008, 1.103) |
| Race: White | 520 | 1.060 (1.015, 1.107) |
| Race: White | 530 | 1.056 (1.007, 1.107) |
| Race: White | 540 | 1.048 (0.961, 1.143) |
| Race: White | 550 | 1.023 (0.926, 1.130) |
| Race: White | 560 | 1.015 (0.920, 1.120) |
| Race: White | 570 | 1.022 (0.935, 1.117) |
| Race: White | 580 | 1.029 (0.945, 1.121) |
| Race: White | 590 | 1.040 (0.951, 1.137) |
| Race: White | 600 | 1.058 (0.974, 1.150) |
| Race: White | 610 | 1.088 (1.002, 1.181) |
| Race: White | 620 | 1.090 (0.999, 1.190) |
| Race: White | 630 | 1.042 (0.991, 1.096) |

|             |     |                      |
|-------------|-----|----------------------|
| Race: White | 640 | 1.034 (0.982, 1.088) |
| Race: White | 650 | 1.037 (0.989, 1.088) |
| Race: White | 660 | 1.041 (0.986, 1.099) |
| Race: White | 670 | 1.043 (0.986, 1.103) |
| Race: White | 680 | 1.052 (0.995, 1.112) |
| Race: White | 690 | 1.043 (0.937, 1.161) |
| Race: White | 700 | 1.033 (0.954, 1.118) |
| Race: White | 710 | 1.026 (0.953, 1.105) |
| Race: White | 720 | 1.018 (0.936, 1.108) |
| Race: White | 730 | 0.987 (0.907, 1.075) |
| Race: White | 740 | 0.998 (0.930, 1.070) |
| Race: White | 750 | 0.991 (0.923, 1.064) |
| Race: White | 760 | 0.991 (0.924, 1.063) |
| Race: White | 770 | 0.996 (0.923, 1.076) |
| Race: White | 780 | 1.004 (0.930, 1.085) |
| Race: White | 790 | 0.976 (0.909, 1.048) |
| Race: White | 800 | 0.967 (0.897, 1.043) |
| Race: White | 810 | 0.990 (0.927, 1.057) |
| Race: White | 820 | 0.999 (0.939, 1.062) |
| Race: White | 830 | 0.999 (0.931, 1.072) |
| Race: White | 840 | 1.012 (0.941, 1.088) |
| Race: White | 850 | 0.989 (0.917, 1.067) |
| Race: White | 860 | 0.975 (0.887, 1.072) |
| Race: White | 870 | 0.946 (0.854, 1.049) |
| Race: White | 880 | 0.878 (0.769, 1.003) |
| Race: White | 890 | 0.935 (0.816, 1.072) |
| Race: White | 900 | 0.997 (0.956, 1.041) |
| Race: Black | 10  | 1.037 (1.005, 1.071) |
| Race: Black | 20  | 1.036 (1.004, 1.069) |
| Race: Black | 30  | 1.036 (1.004, 1.069) |
| Race: Black | 40  | 1.035 (1.004, 1.068) |
| Race: Black | 50  | 1.030 (0.992, 1.069) |
| Race: Black | 60  | 1.028 (0.987, 1.070) |
| Race: Black | 70  | 1.020 (0.940, 1.106) |
| Race: Black | 80  | 1.003 (0.914, 1.100) |
| Race: Black | 90  | 0.993 (0.918, 1.075) |
| Race: Black | 100 | 1.008 (0.932, 1.090) |
| Race: Black | 110 | 1.018 (0.939, 1.105) |
| Race: Black | 120 | 1.025 (0.952, 1.103) |
| Race: Black | 130 | 1.047 (0.984, 1.114) |
| Race: Black | 140 | 1.050 (0.993, 1.111) |
| Race: Black | 150 | 1.046 (0.982, 1.114) |
| Race: Black | 160 | 1.039 (0.970, 1.113) |

|             |     |                      |
|-------------|-----|----------------------|
| Race: Black | 170 | 1.067 (1.008, 1.131) |
| Race: Black | 180 | 1.075 (1.015, 1.138) |
| Race: Black | 190 | 1.073 (0.998, 1.154) |
| Race: Black | 200 | 1.063 (0.998, 1.133) |
| Race: Black | 210 | 1.051 (0.985, 1.121) |
| Race: Black | 220 | 1.034 (0.964, 1.108) |
| Race: Black | 230 | 1.034 (0.971, 1.101) |
| Race: Black | 240 | 1.052 (0.996, 1.110) |
| Race: Black | 250 | 1.027 (0.967, 1.090) |
| Race: Black | 260 | 1.071 (0.995, 1.152) |
| Race: Black | 270 | 1.090 (1.016, 1.169) |
| Race: Black | 280 | 1.081 (1.014, 1.153) |
| Race: Black | 290 | 1.049 (1.010, 1.090) |
| Race: Black | 300 | 1.045 (1.008, 1.084) |
| Race: Black | 310 | 1.040 (1.004, 1.078) |
| Race: Black | 320 | 1.040 (1.005, 1.077) |
| Race: Black | 330 | 1.036 (1.001, 1.073) |
| Race: Black | 340 | 1.036 (1.001, 1.074) |
| Race: Black | 350 | 1.038 (1.002, 1.075) |
| Race: Black | 360 | 1.030 (0.993, 1.070) |
| Race: Black | 370 | 1.030 (0.991, 1.070) |
| Race: Black | 380 | 1.023 (0.985, 1.063) |
| Race: Black | 390 | 1.024 (0.989, 1.059) |
| Race: Black | 400 | 1.025 (0.991, 1.059) |
| Race: Black | 410 | 1.033 (0.995, 1.072) |
| Race: Black | 420 | 1.057 (1.010, 1.107) |
| Race: Black | 430 | 1.069 (1.019, 1.121) |
| Race: Black | 440 | 1.065 (0.977, 1.161) |
| Race: Black | 450 | 1.065 (0.982, 1.155) |
| Race: Black | 460 | 1.052 (0.976, 1.135) |
| Race: Black | 470 | 1.038 (0.959, 1.124) |
| Race: Black | 480 | 1.023 (0.944, 1.110) |
| Race: Black | 490 | 1.044 (0.962, 1.133) |
| Race: Black | 500 | 1.050 (0.950, 1.159) |
| Race: Black | 510 | 1.088 (0.973, 1.216) |
| Race: Black | 520 | 1.059 (0.960, 1.168) |
| Race: Black | 530 | 1.024 (0.921, 1.140) |
| Race: Black | 540 | 1.004 (0.892, 1.129) |
| Race: Black | 550 | 1.006 (0.911, 1.110) |
| Race: Black | 560 | 0.993 (0.924, 1.068) |
| Race: Black | 570 | 1.000 (0.925, 1.081) |
| Race: Black | 580 | 0.992 (0.926, 1.062) |
| Race: Black | 590 | 1.022 (0.940, 1.111) |

|             |     |                         |
|-------------|-----|-------------------------|
| Race: Black | 600 | 1.007 (0.918, 1.105)    |
| Race: Black | 610 | 1.014 (0.920, 1.118)    |
| Race: Black | 620 | 1.042 (0.939, 1.157)    |
| Race: Black | 630 | 0.950 (0.846, 1.067)    |
| Race: Black | 640 | 0.940 (0.828, 1.066)    |
| Race: Black | 650 | 0.944 (0.842, 1.058)    |
| Race: Black | 660 | 0.944 (0.823, 1.083)    |
| Race: Black | 670 | 0.915 (0.791, 1.059)    |
| Race: Black | 680 | 0.906 (0.759, 1.081)    |
| Race: Black | 690 | 0.944 (0.795, 1.121)    |
| Race: Black | 700 | 0.996 (0.850, 1.168)    |
| Race: Black | 710 | 0.961 (0.807, 1.143)    |
| Race: Black | 720 | 1.002 (0.856, 1.172)    |
| Race: Black | 730 | 0.962 (0.796, 1.162)    |
| Race: Black | 740 | 0.935 (0.783, 1.115)    |
| Race: Black | 750 | 0.988 (0.811, 1.205)    |
| Race: Black | 760 | 1.053 (0.893, 1.241)    |
| Race: Black | 770 | 1.029 (0.882, 1.201)    |
| Race: Black | 780 | 1.062 (0.928, 1.215)    |
| Race: Black | 790 | 1.215 (1.055, 1.400)    |
| Race: Black | 800 | 1.170 (1.002, 1.366)    |
| Race: Black | 810 | 1.088 (0.933, 1.269)    |
| Race: Black | 820 | 1.048 (0.885, 1.240)    |
| Race: Black | 830 | 1.044 (0.884, 1.233)    |
| Race: Black | 840 | 1.064 (0.901, 1.256)    |
| Race: Black | 850 | 1.069 (0.915, 1.250)    |
| Race: Black | 860 | 1.126 (0.951, 1.333)    |
| Race: Black | 870 | 1.093 (0.942, 1.268)    |
| Race: Black | 880 | 1.088 (0.933, 1.270)    |
| Race: Black | 890 | 1.132 (0.972, 1.319)    |
| Race: Black | 900 | 1.020 (0.978, 1.064)    |
| Race: Other | 10  | 1.005 (0.928, 1.089)    |
| Race: Other | 20  | 1.007 (0.924, 1.097)    |
| Race: Other | 30  | 1.011 (0.936, 1.092)    |
| Race: Other | 40  | 1.010 (0.934, 1.093)    |
| Race: Other | 50  | 1.010 (0.932, 1.094)    |
| Race: Other | 60  | 1.010 (0.935, 1.090)    |
| Race: Other | 70  | 1.018 (0.962, 1.078)    |
| Race: Other | 80  | NA                      |
| Race: Other | 90  | NA                      |
| Race: Other | 100 | 18.460 (14.545, 23.427) |
| Race: Other | 110 | 1.851 (1.733, 1.977)    |
| Race: Other | 120 | 2.061 (1.885, 2.253)    |



|             |     |                       |
|-------------|-----|-----------------------|
| Race: Other | 130 | 1.333 (1.189, 1.494)  |
| Race: Other | 140 | 1.601 (1.532, 1.674)  |
| Race: Other | 150 | 1.373 (1.314, 1.434)  |
| Race: Other | 160 | 1.653 (1.555, 1.758)  |
| Race: Other | 170 | 1.452 (1.377, 1.532)  |
| Race: Other | 180 | 1.553 (1.445, 1.671)  |
| Race: Other | 190 | 1.494 (1.389, 1.607)  |
| Race: Other | 200 | 1.530 (1.459, 1.604)  |
| Race: Other | 210 | 1.469 (1.403, 1.538)  |
| Race: Other | 220 | 1.260 (1.132, 1.404)  |
| Race: Other | 230 | 0.679 (0.491, 0.939)  |
| Race: Other | 240 | 2.390 (1.997, 2.861)  |
| Race: Other | 250 | 3.537 (2.904, 4.308)  |
| Race: Other | 260 | 0.755 (0.407, 1.400)  |
| Race: Other | 270 | 0.855 (0.795, 0.919)  |
| Race: Other | 280 | 0.349 (0.276, 0.441)  |
| Race: Other | 290 | 0.767 (0.628, 0.937)  |
| Race: Other | 300 | 0.740 (0.604, 0.908)  |
| Race: Other | 310 | 0.723 (0.569, 0.918)  |
| Race: Other | 320 | 0.548 (0.389, 0.771)  |
| Race: Other | 330 | 0.801 (0.641, 1.000)  |
| Race: Other | 340 | 1.398 (1.186, 1.649)  |
| Race: Other | 350 | 0.967 (0.794, 1.178)  |
| Race: Other | 360 | 0.836 (0.048, 14.442) |
| Race: Other | 370 | 3.037 (2.660, 3.468)  |
| Race: Other | 380 | 1.710 (1.354, 2.159)  |
| Race: Other | 390 | 2.615 (2.320, 2.947)  |
| Race: Other | 400 | 1.808 (1.378, 2.373)  |
| Race: Other | 410 | 1.082 (0.886, 1.322)  |
| Race: Other | 420 | 1.263 (1.116, 1.430)  |
| Race: Other | 430 | 1.783 (1.480, 2.147)  |
| Race: Other | 440 | 2.097 (1.841, 2.388)  |
| Race: Other | 450 | 1.875 (1.325, 2.652)  |
| Race: Other | 460 | 0.219 (0.158, 0.303)  |
| Race: Other | 470 | 0.320 (0.258, 0.396)  |
| Race: Other | 480 | 0.454 (0.332, 0.621)  |
| Race: Other | 490 | 1.012 (0.894, 1.145)  |
| Race: Other | 500 | 0.647 (0.562, 0.744)  |
| Race: Other | 510 | 0.199 (0.161, 0.244)  |
| Race: Other | 520 | 2.342 (2.082, 2.634)  |
| Race: Other | 530 | 1.389 (1.219, 1.584)  |
| Race: Other | 540 | 1.006 (0.537, 1.886)  |
| Race: Other | 550 | 2.418 (2.189, 2.671)  |

|             |     |                      |
|-------------|-----|----------------------|
| Race: Other | 560 | 1.725 (1.459, 2.039) |
| Race: Other | 570 | 1.496 (1.315, 1.701) |
| Race: Other | 580 | 1.460 (1.294, 1.647) |
| Race: Other | 590 | 1.137 (0.962, 1.345) |
| Race: Other | 600 | 0.927 (0.764, 1.126) |
| Race: Other | 610 | NA                   |
| Race: Other | 620 | 0.788 (0.493, 1.260) |
| Race: Other | 630 | 1.175 (0.648, 2.130) |
| Race: Other | 640 | 1.038 (0.763, 1.411) |
| Race: Other | 650 | 1.074 (0.924, 1.247) |
| Race: Other | 660 | 0.986 (0.822, 1.183) |
| Race: Other | 670 | 1.025 (0.773, 1.361) |
| Race: Other | 680 | 0.980 (0.766, 1.253) |
| Race: Other | 690 | 0.694 (0.537, 0.895) |
| Race: Other | 700 | 0.543 (0.413, 0.713) |
| Race: Other | 710 | 0.663 (0.580, 0.758) |
| Race: Other | 720 | 0.739 (0.570, 0.958) |
| Race: Other | 730 | 0.740 (0.618, 0.886) |
| Race: Other | 740 | NA                   |
| Race: Other | 750 | NA                   |
| Race: Other | 760 | 1.219 (0.926, 1.603) |
| Race: Other | 770 | 1.119 (0.390, 3.212) |
| Race: Other | 780 | 1.467 (1.179, 1.824) |
| Race: Other | 790 | 2.245 (1.324, 3.808) |
| Race: Other | 800 | 1.286 (0.991, 1.669) |
| Race: Other | 810 | 1.261 (1.044, 1.524) |
| Race: Other | 820 | 1.172 (0.934, 1.471) |
| Race: Other | 830 | 1.041 (0.818, 1.323) |
| Race: Other | 840 | 1.257 (0.613, 2.578) |
| Race: Other | 850 | 0.905 (0.714, 1.146) |
| Race: Other | 860 | 1.142 (0.882, 1.478) |
| Race: Other | 870 | 1.376 (1.120, 1.691) |
| Race: Other | 880 | 0.578 (0.480, 0.696) |
| Race: Other | 890 | 0.636 (0.514, 0.787) |
| Race: Other | 900 | 1.256 (0.835, 1.890) |
